# Supplementary material for: Family outcome disparities between sexual minority and heterosexual families: a systematic review and meta-analysis
Source: PubMed Central journal article supplement — BMJ Glob Health. 2023 Feb 8;8(3):e010556. doi: 10.1136/bmjgh-2022-010556 (PMC10016267; doi:10.1136/bmjgh-2022-010556), 2023-02-08
Supplement: bmjgh-2022-010556supp001.pdf [file bmjgh-2022-010556supp001.pdf]

## Supplemental materials

### Contents

1. Supplemental Table S1 Detailed search strategy
2. Supplemental Table S2a. JBI Critical Appraisal Checklist for Analytical Cross-Sectional Studies (n=24)
3. Supplemental Table S2b. JBI Critical Appraisal Checklist for Cohort Studies (n=7)
4. Supplemental Table S2c. JBI Critical Appraisal Checklist for Qualitative Research (n=3)
5. Supplemental Table S3 The detailed definition and explanation of each outcome
6. Supplemental Table S4a. Data and outcome measures of each study included in quasi meta-analysis for children's psychological adjustment
7. Supplemental Table S4b. Data and outcome measures of each study included in quasi meta-analysis for parental mental health
8. Supplemental Table S4c. Data and outcome measures of each study included in quasi meta-analysis for parenting stress
9. Supplemental Table S4d. Data and outcome measures of each study included in quasi meta-analysis for parent-child relationship
10. Supplemental Table S4e. Data and outcome measures of each study included in quasi meta-analysis for couple relationship satisfaction
11. Supplemental Table S4f. Data and outcome measures of each study included in quasi meta-analysis for family functioning
12. Supplemental Figure S5a. Sensitivity analysis for children's psychological adjustment
13. Supplemental Figure S5b. Sensitivity analysis for parental mental health
14. Supplemental Figure S5c. Sensitivity analysis for parenting stress
15. Supplemental Figure S5d. Sensitivity analysis for parent-child relationship
16. Supplemental Figure S5e. Sensitivity analysis for couple relationship satisfaction

17. Supplemental Figure S5f. Sensitivity analysis for family functioning
18. Supplemental Figure S6. Subgroup analysis for children's psychological adjustment
19. Supplemental Figure S7a. Funnel plot for children's psychological adjustment
20. Supplemental Figure S7b. Funnel plot for parental mental health
21. Supplemental Figure S7c. Funnel plot for parenting stress
22. Supplemental Figure S7d. Funnel plot for parent-child relationship
23. Supplemental Figure S7e. Funnel plot for couple relationship satisfaction
24. Supplemental Figure S7f. Funnel plot for family functioning

**1. Table S1 Detailed search strategy****Search strategy in each selected database:****PubMed: Search April 1, 2022**

| Number | Process                                                                                                                                                                                                                                                                                                                                                                                                                                                                                                                                                                                                               | Amount  |
|--------|-----------------------------------------------------------------------------------------------------------------------------------------------------------------------------------------------------------------------------------------------------------------------------------------------------------------------------------------------------------------------------------------------------------------------------------------------------------------------------------------------------------------------------------------------------------------------------------------------------------------------|---------|
| #1     | ("Sexual and Gender Minorities"[MeSH Terms]) AND (1989/1/1:2022/4/1[pdat])                                                                                                                                                                                                                                                                                                                                                                                                                                                                                                                                            | 12252   |
| #2     | ("lgbt"[Title/Abstract] OR "Lesbigay"[Title/Abstract] OR "LBG"[Title/Abstract] OR "sexual minorit*" [Title/Abstract] OR "non heterosexual*" [Title/Abstract] OR "sexual dissident*" [Title/Abstract] OR "gibt*" [Title/Abstract] OR "gay" [Title/Abstract] OR "men who have sex with men" [Title/Abstract] OR "MSM" [Title/Abstract] OR "gender minorit*" [Title/Abstract] OR "lesbian*" [Title/Abstract] OR "women who have sex with women" [Title/Abstract] OR "WSW" [Title/Abstract] OR "bisexual*" [Title/Abstract] OR "homosexual*" [Title/Abstract] OR "queer*" [Title/Abstract]) AND (1989/1/1:2022/4/1[pdat]) | 42746   |
| #3     | #1 OR #2                                                                                                                                                                                                                                                                                                                                                                                                                                                                                                                                                                                                              | 46889   |
| #4     | ("child*" [Title/Abstract] OR "children*" [Title/Abstract] OR "parent*" [Title/Abstract]) AND (1989/1/1:2022/4/1[pdat])                                                                                                                                                                                                                                                                                                                                                                                                                                                                                               | 1493318 |
| #5     | #3 AND #4                                                                                                                                                                                                                                                                                                                                                                                                                                                                                                                                                                                                             | 3850    |
| #6     | ("Marriage"[MeSH Terms]) AND (1989/1/1:2022/4/1[pdat])                                                                                                                                                                                                                                                                                                                                                                                                                                                                                                                                                                | 13667   |
| #7     | ("marriage*" [Title/Abstract] OR "same sex marriage*" [Title/Abstract] OR ("register"[All Fields] OR "register s"[All Fields] OR "registered"[All Fields] OR "registering"[All Fields] OR "registers"[All Fields]) AND "domestic partnership*" [Title/Abstract]) OR "SSM" [Title/Abstract] OR "RDP" [Title/Abstract] OR "civil union*" [Title/Abstract] OR "same sex relationship*" [Title/Abstract] OR "same sex partner*" [Title/Abstract] OR "same sex couple*" [Title/Abstract] OR "committed relationship*" [Title/Abstract] OR "relationship formalisation" [Title/Abstract]) AND (1989/1/1:2022/4/1[pdat])     | 21904   |
| #8     | #6 OR #7                                                                                                                                                                                                                                                                                                                                                                                                                                                                                                                                                                                                              | 30070   |
| #9     | #5 AND #8                                                                                                                                                                                                                                                                                                                                                                                                                                                                                                                                                                                                             | 259     |

**EMBASE: Search April 1, 2022**

| Number | Process                                                                                                                                                                                                                                                                                                                                                                                                                                     | Amount  |
|--------|---------------------------------------------------------------------------------------------------------------------------------------------------------------------------------------------------------------------------------------------------------------------------------------------------------------------------------------------------------------------------------------------------------------------------------------------|---------|
| #1     | 'sexual and gender minority'/exp AND [01-01-1989]/sd NOT [02-04-2022]/sd AND [embase]/lim                                                                                                                                                                                                                                                                                                                                                   | 30985   |
| #2     | ('non heterosexual*':ab,ti OR 'sexual dissident*':ab,ti OR 'gender minorit*':ab,ti OR lesbigay:ab,ti OR 'sexual minorit*':ab,ti OR 'men who have sex with men':ab,ti OR 'women who have sex with women':ab,ti OR msm:ab,ti OR wsw:ab,ti OR lesbian*':ab,ti OR gay*':ab,ti OR bisexual*':ab,ti OR queer*':ab,ti OR homosexual*':ab,ti OR lgb:ab,ti OR lgbt*':ab,ti OR glbt*':ab,ti) AND [embase]/lim AND [01-01-1989]/sd NOT [02-04-2022]/sd | 37103   |
| #3     | #1 OR #2                                                                                                                                                                                                                                                                                                                                                                                                                                    | 47699   |
| #4     | ('parent*':ab,ti OR 'child*':ab,ti OR 'children*':ab,ti) AND [embase]/lim AND [01-01-1989]/sd NOT [02-04-2022]/sd                                                                                                                                                                                                                                                                                                                           | 1609722 |
| #5     | #3 AND #4                                                                                                                                                                                                                                                                                                                                                                                                                                   | 3671    |
| #6     | 'same-sex marriage'/exp AND [01-01-1989]/sd NOT [02-04-2022]/sd AND [embase]/lim                                                                                                                                                                                                                                                                                                                                                            | 192     |
| #7     | ('same-sex marriage*':ab,ti OR 'registered domestic partnership*':ab,ti OR ssm:ab,ti OR rdp:ab,ti OR 'civil union*':ab,ti OR 'same-sex relationship*':ab,ti OR 'same-sex partner*':ab,ti OR 'same-sex couple*':ab,ti OR 'committed relationship*':ab,ti OR 'relationship formalisation':ab,ti) AND [embase]/lim AND [01-01-1989]/sd NOT [02-04-2022]/sd                                                                                     | 4379    |
| #8     | #6 OR #7                                                                                                                                                                                                                                                                                                                                                                                                                                    | 4487    |
| #9     | #5 AND #8                                                                                                                                                                                                                                                                                                                                                                                                                                   | 99      |

**Web of science: Search April 1, 2022**

| Number | Process                                                                                                                                                                                                                                                                                                                                                                                                                                                         | Amount  |
|--------|-----------------------------------------------------------------------------------------------------------------------------------------------------------------------------------------------------------------------------------------------------------------------------------------------------------------------------------------------------------------------------------------------------------------------------------------------------------------|---------|
| #1     | (((((TI=(LGBT*)) OR TI=(lesbian)) OR TI=(LGB)) OR TI=(Sexual Minorit*)) OR TI=(Non-Heterosexual*)) OR TI=(Sexual Dissident*)) OR TI=(GLBT*)) OR TI=(Gay*)) OR TI=(Men Who Have Sex With Men)) OR TI=(MSM)) OR TI=(Gender Minorit*)) OR TI=(Lesbian*)) OR TI=(Women Who Have Sex With Women)) OR TI=(WSW)) OR TI=(Bisexual*)) OR TI=(Homosexual*)) OR TI=(Queer*)) OR TI=(Sexual and Gender Minorit*) AND Timespan: 1989-01-01 to 2022-04-01 (Publication Date)  | 55698   |
| #2     | (((((AB=(LGBT*)) OR AB=(Lesbigay)) OR AB=(LGB)) OR AB=(Sexual Minorit*)) OR AB=(Non-Heterosexual*)) OR AB=(Sexual Dissident*)) OR AB=(GLBT*)) OR AB=(Gay*)) OR AB=(Men Who Have Sex With Men)) OR AB=(MSM)) OR AB=(Gender Minorit*)) OR AB=(Lesbian*)) OR AB=(Women Who Have Sex With Women)) OR AB=(WSW)) OR AB=(Bisexual*)) OR AB=(Homosexual*)) OR AB=(Queer*)) OR AB=(Sexual and Gender Minorit*) AND Timespan: 1989-01-01 to 2022-04-01 (Publication Date) | 84175   |
| #3     | #1 OR #2                                                                                                                                                                                                                                                                                                                                                                                                                                                        | 111080  |
| #4     | ((TI=(child*)) OR TI=(children*)) OR TI=(parent*) AND Timespan: 1989-01-01 to 2022-04-01 (Publication Date)                                                                                                                                                                                                                                                                                                                                                     | 945409  |
| #5     | ((AB=(child*)) OR AB=(children*)) OR AB=(parent*) AND Timespan: 1989-01-01 to 2022-04-01 (Publication Date)                                                                                                                                                                                                                                                                                                                                                     | 1543193 |
| #6     | #4 OR #5                                                                                                                                                                                                                                                                                                                                                                                                                                                        | 1921405 |
| #7     | #3 AND #6                                                                                                                                                                                                                                                                                                                                                                                                                                                       | 8140    |
| #8     | (((((TI=(marriage*)) OR TI=(Same-sex marriage*)) OR TI=(registered domestic partnership*)) OR TI=(SSM)) OR TI=(RDP)) OR TI=(civil union*)) OR TI=(Same-sex relationship*)) OR TI=(Same-sex partner*)) OR TI=(Same-sex couple*)) OR TI=(committed relationship*)) OR TI=(relationship formalisation) AND Timespan: 1989-01-01 to 2022-04-01 (Publication Date)                                                                                                   | 23390   |
| #9     | (((((AB=(marriage*)) OR AB=(Same-sex marriage*)) OR AB=(registered domestic partnership*)) OR AB=(SSM)) OR AB=(RDP)) OR AB=(civil union*)) OR AB=(Same-sex relationship*)) OR AB=(Same-sex partner*)) OR AB=(Same-sex couple*)) OR AB=(committed relationship*)) OR AB=(relationship formalisation) AND Timespan: 1989-01-01 to 2022-04-01 (Publication Date)                                                                                                   | 55919   |
| #10    | #8 OR #9                                                                                                                                                                                                                                                                                                                                                                                                                                                        | 70270   |
| #11    | #7 AND #10                                                                                                                                                                                                                                                                                                                                                                                                                                                      | 699     |

**Cochrane Library: Search April 1, 2022**

| Number | Process                                                                                                                                                                                                                                                                                                                                       | Amount |
|--------|-----------------------------------------------------------------------------------------------------------------------------------------------------------------------------------------------------------------------------------------------------------------------------------------------------------------------------------------------|--------|
| #1     | MeSH descriptor: [Sexual and Gender Minorities] explode all trees                                                                                                                                                                                                                                                                             | 181    |
| #2     | (LGBT* OR Lesbigan OR LBG OR (Sexual Minorit*) OR Non-Heterosexual* OR (Sexual Dissident*) OR GLBT* OR Gay* OR MSM OR (Men Who Have Sex With Men) OR (Gender Minorit*) OR Lesbian* OR (Women Who Have Sex With Women) OR WSW OR Bisexual* OR Homosexual* OR Queer*):ti,ab,kw with Cochrane Library publication date from Jan 1989 to Apr 2022 | 4522   |
| #3     | #1 OR #2                                                                                                                                                                                                                                                                                                                                      | 4540   |
| #4     | (child* OR children* OR parent*):ti,ab,kw with Cochrane Library publication date from Jan 1989 to Apr 2022                                                                                                                                                                                                                                    | 191729 |
| #5     | #3 AND #4                                                                                                                                                                                                                                                                                                                                     | 528    |
| #6     | MeSH descriptor: [Marriage] explode all trees                                                                                                                                                                                                                                                                                                 | 288    |
| #7     | (marriage* OR (Same sex marriage*) OR (registered domestic partnership*) OR SSM OR RDP OR (civil union*) OR (Same sex relationship*) OR (Same sex partner*) OR (Same sex couple*) OR (committed relationship*) OR (relationship formalisation)):ti,ab,kw with Cochrane Library publication date from Jan 1989 to Apr 2022                     | 2982   |
| #8     | #6 OR #7                                                                                                                                                                                                                                                                                                                                      | 2982   |
| #9     | #5 AND #8                                                                                                                                                                                                                                                                                                                                     | 46     |

**APA PsycNet: Search April 1, 2022**

| Number | Process                                                                                                                                                                                                                                                                                                                                                                                                                                                                              | Amount |
|--------|--------------------------------------------------------------------------------------------------------------------------------------------------------------------------------------------------------------------------------------------------------------------------------------------------------------------------------------------------------------------------------------------------------------------------------------------------------------------------------------|--------|
| 1      | Title: Sexual AND Title: Gender Minorit* OR Title: LGBT* OR Title: Lesbigan OR Title: LBG OR Title: Sexual Minorit* OR Title: Non-Heterosexual* OR Title: SexualDissident* OR Title: GLBT* OR Title: Gay* OR Title: Men Who Have Sex With Men OR Title: MSM OR Title: Gender Minorit* OR Title: Lesbian* OR Title: Women Who Have Sex With Women OR Title: WSW OR Title: Bisexual* OR Title: Homosexual* OR Title: Queer* AND Year: 1989 To 2022                                     | 1,847  |
| 2      | 9,406 Results for Abstract: Sexual AND Abstract: Gender Minorit* OR Abstract: LGBT* OR Abstract: Lesbigan OR Abstract: LBG OR Abstract: Sexual Minorit* OR Abstract: Non-Heterosexual* OR Abstract: Sexual Dissident* OR Abstract: GLBT* OR Abstract: Gay* OR Abstract: Men Who Have Sex With Men OR Abstract: MSM OR Abstract: Gender Minorit* OR Abstract: Lesbian* OR Abstract: Women Who Have Sex With Women OR Abstract: Homosexual* OR Abstract: Queer* AND Year: 1989 To 2022 | 9406   |
| 3      | 3,492 Results for Keywords: Sexual AND Keywords: Gender Minorit* OR Keywords: LGBT* OR Keywords: Lesbigan OR Keywords: LBG OR Keywords: Sexual Minorit* OR Keywords: Non-Heterosexual* OR                                                                                                                                                                                                                                                                                            | 3492   |

|    |                                                                                                                                                                                                                                                                                                                                          |        |
|----|------------------------------------------------------------------------------------------------------------------------------------------------------------------------------------------------------------------------------------------------------------------------------------------------------------------------------------------|--------|
|    | Keywords: Sexual Dissident* OR Keywords: GLBT* OR Keywords: Gay* OR Keywords: Men Who Have Sex With Men OR Keywords: MSM OR Keywords: Gender Minorit* OR Keywords: Lesbian* OR Keywords: Women Who Have Sex With Women OR Keywords: Homosexual* OR Keywords: Queer* AND Year: 1989 To 2022                                               |        |
| 4  | 1 OR 2 OR 3                                                                                                                                                                                                                                                                                                                              | 9997   |
| 5  | Title: child* OR Title: children* OR Title: parent* AND Year: 1989 To 2022                                                                                                                                                                                                                                                               | 14,033 |
| 6  | Abstract: child* OR Abstract: children* OR Abstract: parent* AND Year: 1989 To 2022                                                                                                                                                                                                                                                      | 30,389 |
| 7  | Keywords: child* OR Keywords: children* OR Keywords: parent* AND Year: 1989 To 2022                                                                                                                                                                                                                                                      | 22,810 |
| 8  | 5 OR 6 OR 7                                                                                                                                                                                                                                                                                                                              | 32,358 |
| 9  | 4 AND 8                                                                                                                                                                                                                                                                                                                                  | 1650   |
| 10 | Index Terms: {Same Sex Marriage} OR Title: Marriage* OR Title: registered domestic partnership* OR Title: SSM OR Title: RDP OR Title: civil union* OR Title: Same sex relationship* OR Title: Same sex partner* OR Title: Same sex couple* OR Title: committed relationship* OR Title: relationship formalisation AND Year: 1989 To 2022 | 341    |
| 11 | Index Terms: {Same Sex Marriage} OR Abstract: Marriage* OR Abstract: registered domestic partnership* OR Abstract: SSM OR Abstract: RDP OR Abstract: civil union* OR Abstract: Same sex relationship* OR Abstract: Same sex couple* OR Abstract: committed relationship* OR Abstract: relationship formalisation AND Year: 1989 To 2022  | 1,504  |
| 12 | Index Terms: {Same Sex Marriage} OR Keywords: Marriage* OR Keywords: registered domestic partnership* OR Keywords: SSM OR Keywords: RDP OR Keywords: civil union* OR Keywords: Same sex relationship* OR Keywords: Same sex couple* OR Keywords: committed relationship* OR Keywords: relationship formalisation AND Year: 1989 To 2022  | 1,172  |
| 13 | 10 OR 11 OR 12                                                                                                                                                                                                                                                                                                                           | 2154   |
| 14 | 9 AND 13                                                                                                                                                                                                                                                                                                                                 | 91     |

**2. Table S2a. JBI Critical Appraisal Checklist for Analytical Cross-Sectional Studies (n=24)**

| Author(year)                  | 1. Were the criteria for inclusion in the sample clearly defined? | 2. Were the study subjects and the setting described in detail? | 3. Was the exposure measured in a valid and reliable way? | 4. Were objective, standard criteria used for measurement of the condition? | 5. Were confounding factors identified? | 6. Were strategies to deal with confounding factors stated? | 7. Were the outcomes measured in a valid and reliable way? | 8. Was appropriate statistical analysis used? | Score percentage (%) | Risk of bias (low/moderate/high) |
|-------------------------------|-------------------------------------------------------------------|-----------------------------------------------------------------|-----------------------------------------------------------|-----------------------------------------------------------------------------|-----------------------------------------|-------------------------------------------------------------|------------------------------------------------------------|-----------------------------------------------|----------------------|----------------------------------|
| Bos (2018) <sup>32</sup>      | ✓                                                                 | ✓                                                               | ✓                                                         | ✓                                                                           | ×                                       | ✓                                                           | ✓                                                          | ✓                                             | 88                   | low                              |
| Crouch (2014) <sup>38</sup>   | ✓                                                                 | ✓                                                               | ✓                                                         | ✓                                                                           | ✓                                       | ✓                                                           | ✓                                                          | ✓                                             | 100                  | low                              |
| Reczek (2018) <sup>37</sup>   | ×                                                                 | ✓                                                               | ✓                                                         | ×                                                                           | ✓                                       | ✓                                                           | ✓                                                          | ✓                                             | 75                   | low                              |
| Bos (2016) <sup>40</sup>      | ×                                                                 | ✓                                                               | ×                                                         | ×                                                                           | ✓                                       | ✓                                                           | ✓                                                          | ✓                                             | 63                   | moderate                         |
| Baiocco (2018) <sup>28</sup>  | ×                                                                 | ✓                                                               | ✓                                                         | ✓                                                                           | ×                                       | ✓                                                           | ✓                                                          | ✓                                             | 75                   | low                              |
| Cenegy (2017) <sup>19</sup>   | ×                                                                 | ✓                                                               | ✓                                                         | ×                                                                           | ✓                                       | ✓                                                           | ✓                                                          | ✓                                             | 75                   | low                              |
| Solomon (2004) <sup>53</sup>  | ×                                                                 | ✓                                                               | ✓                                                         | ×                                                                           | ×                                       | ✓                                                           | ×                                                          | ✓                                             | 50                   | moderate                         |
| Golombok (2014) <sup>35</sup> | ✓                                                                 | ✓                                                               | ✓                                                         | ✓                                                                           | ✓                                       | ✓                                                           | ✓                                                          | ✓                                             | 100                  | low                              |
| Averett (2009) <sup>25</sup>  | ✓                                                                 | ✓                                                               | ×                                                         | ✓                                                                           | ✓                                       | ✓                                                           | ✓                                                          | ✓                                             | 88                   | low                              |
| Calzo (2019) <sup>18</sup>    | ×                                                                 | ✓                                                               | ✓                                                         | ✓                                                                           | ✓                                       | ✓                                                           | ✓                                                          | ✓                                             | 88                   | low                              |
| Boertien (2019) <sup>44</sup> | ✓                                                                 | ✓                                                               | ×                                                         | ✓                                                                           | ✓                                       | ✓                                                           | ✓                                                          | ✓                                             | 88                   | low                              |
| Watkins (2018) <sup>46</sup>  | ✓                                                                 | ✓                                                               | ×                                                         | ✓                                                                           | ✓                                       | ✓                                                           | ✓                                                          | ✓                                             | 88                   | low                              |
| Bos (2010) <sup>29</sup>      | ×                                                                 | ✓                                                               | ×                                                         | ✓                                                                           | ✓                                       | ✓                                                           | ✓                                                          | ✓                                             | 75                   | low                              |
| Carnaghi (2018) <sup>41</sup> | ×                                                                 | ✓                                                               | ✓                                                         | ×                                                                           | ×                                       | ×                                                           | ✓                                                          | ✓                                             | 50                   | moderate                         |
| Sullins (2015) <sup>39</sup>  | ×                                                                 | ✓                                                               | ×                                                         | ✓                                                                           | ✓                                       | ✓                                                           | ✓                                                          | ✓                                             | 75                   | low                              |



|                               |   |   |   |   |   |   |   |   |     |          |
|-------------------------------|---|---|---|---|---|---|---|---|-----|----------|
| Kabátek (2021) <sup>45</sup>  | × | ✓ | ✓ | × | ✓ | ✓ | ✓ | ✓ | 75  | low      |
| Regnerus (2012) <sup>20</sup> | × | ✓ | × | × | ✓ | ✓ | × | ✓ | 50  | moderate |
| Allen (2013) <sup>43</sup>    | × | ✓ | × | ✓ | ✓ | ✓ | ✓ | ✓ | 75  | low      |
| Farr (2010) <sup>26</sup>     | ✓ | ✓ | × | ✓ | ✓ | ✓ | ✓ | ✓ | 88  | low      |
| Bos (2007) <sup>31</sup>      | ✓ | ✓ | × | ✓ | ✓ | ✓ | ✓ | ✓ | 88  | low      |
| Goldberg (2020) <sup>35</sup> | ✓ | ✓ | ✓ | ✓ | ✓ | ✓ | ✓ | ✓ | 100 | low      |
| Farr (2013) <sup>50</sup>     | ✓ | ✓ | ✓ | ✓ | ✓ | ✓ | ✓ | ✓ | 100 | low      |
| Gelderen (2018) <sup>48</sup> | ✓ | ✓ | ✓ | ✓ | ✓ | ✓ | ✓ | ✓ | 100 | low      |

Note. ✓ = “yes”, ✗ = “no”, “unclear”, or “not applicable”.

\*Risk of bias: low = score of 70% or higher, moderate = 50%–69%, high = 49% or lower.

\*References cited in this table correspond to the references in main text.

### 3. Table S2b. JBI Critical Appraisal Checklist for Cohort Studies (n=7)

| Author(year) | 1. Were the two groups similar and recruited from the same population? | 2. Were the exposures measured similarly to both exposed and unexposed? | 3. Was the exposure measured in a valid and reliable way? | 4. Were confounding factors identified? | 5. Were strategies to deal with confounding factors stated? | 6. Were the groups/participants free of the outcome at the start of the study (or at exposure)? | 7. Were the outcomes measured in a valid and reliable way? | 8. Was the time reported and sufficient to be long enough for outcomes? | 9. Was follow up complete, and if not, were the reasons to follow up described and | 10. Were strategies to address incomplete follow up utilized? | 11. Was appropriate statistical analysis used? | Score (%) | Risk of bias (low/moderate/high) |
|--------------|------------------------------------------------------------------------|-------------------------------------------------------------------------|-----------------------------------------------------------|-----------------------------------------|-------------------------------------------------------------|-------------------------------------------------------------------------------------------------|------------------------------------------------------------|-------------------------------------------------------------------------|------------------------------------------------------------------------------------|---------------------------------------------------------------|------------------------------------------------|-----------|----------------------------------|
|--------------|------------------------------------------------------------------------|-------------------------------------------------------------------------|-----------------------------------------------------------|-----------------------------------------|-------------------------------------------------------------|-------------------------------------------------------------------------------------------------|------------------------------------------------------------|-------------------------------------------------------------------------|------------------------------------------------------------------------------------|---------------------------------------------------------------|------------------------------------------------|-----------|----------------------------------|

|                                  | groups? |   |   |   |   |   |   | to occur? | explored? |   |   |     |     |
|----------------------------------|---------|---|---|---|---|---|---|-----------|-----------|---|---|-----|-----|
| Gartrell (2010) <sup>33</sup>    | ×       | ✓ | × | ✓ | ✓ | ✓ | ✓ | ✓         | ✓         | × | ✓ | 73  | low |
| Goldberg (2016) <sup>42</sup>    | ✓       | ✓ | × | ✓ | ✓ | ✓ | ✓ | ✓         | ✓         | × | ✓ | 82  | low |
| Farr (2017) <sup>49</sup>        | ✓       | ✓ | × | ✓ | ✓ | ✓ | ✓ | ✓         | ✓         | ✓ | ✓ | 91  | low |
| Goldberg (2017) <sup>27</sup>    | ✓       | ✓ | × | ✓ | ✓ | ✓ | ✓ | ✓         | ✓         | ✓ | ✓ | 91  | low |
| McConnachie (2021) <sup>36</sup> | ✓       | ✓ | ✓ | ✓ | ✓ | ✓ | ✓ | ✓         | ✓         | ✓ | ✓ | 100 | low |
| Bos (2015) <sup>30</sup>         | ✓       | ✓ | ✓ | ✓ | ✓ | ✓ | ✓ | ✓         | ✓         | ✓ | ✓ | 100 | low |
| Farr (2020) <sup>47</sup>        | ✓       | ✓ | ✓ | ✓ | ✓ | ✓ | ✓ | ✓         | ✓         | ✓ | ✓ | 100 | low |

Note. ✓ = “yes”, ✗ = “no”, “unclear”, or “not applicable”.

\*Risk of bias: low = score of 70% or higher, moderate = 50%–69%, high = 49% or lower.

\*References cited in this table correspond to the references in main text.

**4. Table S2c. JBI Critical Appraisal Checklist for Qualitative Research (n=3)**

| Author(year)                  | 1. Is there congruity between the stated philosophical perspective and the research methodology? | 2. Is there congruity between the research methodology and the research question or objectives? | 3. Is there congruity between the research methodology and the methods used to collect data? | 4. Is there congruity between the research methodology and the representation and analysis of data? | 5. Is there congruity between the research methodology and the interpretation of results? | 6. Is there a statement locating the researcher culturally or theoretically? | 7. Is the influence of the researcher on the research, and vice-versa, addressed? | 8. Are participants, and their voices, adequately represented? | 9. Is the research ethical according to current criteria or, for recent studies, and is there evidence of ethical approval by an appropriate body? | 10. Do the conclusions drawn in the research report flow from the analysis, or interpretation, of the data? | Score percentage (%) | Risk of bias* (low/moderate/high) |
|-------------------------------|--------------------------------------------------------------------------------------------------|-------------------------------------------------------------------------------------------------|----------------------------------------------------------------------------------------------|-----------------------------------------------------------------------------------------------------|-------------------------------------------------------------------------------------------|------------------------------------------------------------------------------|-----------------------------------------------------------------------------------|----------------------------------------------------------------|----------------------------------------------------------------------------------------------------------------------------------------------------|-------------------------------------------------------------------------------------------------------------|----------------------|-----------------------------------|
| Goldberg (2014) <sup>54</sup> | ✓                                                                                                | ✓                                                                                               | ✓                                                                                            | ✓                                                                                                   | ✓                                                                                         | ✓                                                                            | ✓                                                                                 | ✓                                                              | ×                                                                                                                                                  | ✓                                                                                                           | 90                   | low                               |
| Goldberg (2012) <sup>52</sup> | ✓                                                                                                | ✓                                                                                               | ✓                                                                                            | ✓                                                                                                   | ✓                                                                                         | ×                                                                            | ×                                                                                 | ✓                                                              | ×                                                                                                                                                  | ✓                                                                                                           | 70                   | low                               |
| Goldberg (2017) <sup>55</sup> | ✓                                                                                                | ✓                                                                                               | ✓                                                                                            | ✓                                                                                                   | ✓                                                                                         | ✓                                                                            | ✓                                                                                 | ✓                                                              | ×                                                                                                                                                  | ✓                                                                                                           | 90                   | low                               |

Note. ✓ = “yes”, ✗ = “no”, “unclear”, or “not applicable”.

\*Risk of bias: low = score of 70% or higher, moderate = 50%–69%, high = 49% or lower.

\*References cited in this table correspond to the references in main text.

### 5. Table S3. The detailed definition and explanation of each outcome

Outcomes were categorized into the following three areas including 11 themes: children's developmental outcomes (children's psychological adjustment, physical health, gender role behavior, gender identity/sexual orientation, and education outcomes), parents' psychological adjustment (parental mental health, parenting stress), household-level outcomes (parent-child relationship, couple relationship satisfaction, family functioning, social support). The detailed definition and explanation of each outcome is as follows.

#### **Children's developmental outcomes**

Children's developmental outcomes (children refer to parents' offspring of all ages throughout the article) are typically divided into the following categories: the children's psychological adjustment, physical health, gender role behavior, gender identity/sexual orientation, and education outcomes.

#### **Psychological adjustment**

Psychological adjustment is defined as the measure of a child's emotional problems, peer problems, conduct problems, social competence, hyperactivity, self-worth, and overall mental health. It is generally assessed through questionnaires filled out by either the child, parent, or teacher, such as the Teacher Report Form (TRF; Achenbach, 2000)<sup>1 2</sup>, the Strengths and Difficulties Questionnaire (SDQ; Goodman, 2000)<sup>3</sup>, the Child Behavioral Checklist (CBCL; Achenbach & Rescorla, 2000; Achenbach, 2001)<sup>1</sup>, or the Strengths and Difficulties Questionnaire (SFSDQ; Bourdon et al., 2005)<sup>4</sup>.

#### **Physical health**

Physical health is a blanket term referring to not only the child's bodily function, but also to the child's activity limitation and loss of school days due to illness. Thus, in the current review, the prevalence of general health was taken into account and typically measured by assessments such as the Child Health Questionnaire (CHQ)<sup>5</sup> as well as reports of children's physical health status as measured by semi-structured interviews or self-report data.

#### Gender role behavior

Gender role behavior refers to behaviors and behavioral characteristics that are regarded by society as appropriate for a certain gender. It includes aspects of personality traits, values, abilities, interests, and behaviors in family or professional activities. Gender role behavior is most commonly measured through the Preschoolers' Activities Inventory (PSAI; Golombok & Rust, 1993)<sup>6</sup> scale which tends to the children's gender-typical activities, and the choice of toys or games.

#### Gender identity/ Sexual orientation

Gender identity is defined as an individual's sense of being male or female, whereas sexual orientation is defined as an individual's ability to have strong emotional and sexual attraction to and to form intimate or sexual relationships with members of the opposite or same biological sex. Sexual orientation may differ from external gender identification or may be independent of sexual behavior. There are numerous multidimensional gender identity questionnaires for measuring the two, such as the Kinsey scale of sexual behavior<sup>7 8</sup>

#### Educational outcomes

Children's educational outcomes included school progress and academic competence, which can be measured based on current age and the highest grade completed by children as well as measures of standardized tests scores, mean grade retention rates, school graduation probabilities, college enrollment, academic ability, etc.

#### **Parents' psychological adjustment**

Parents' psychological adjustment purports to measure parents' mental health and parenting stress and is measured not only through standardized, norm-referenced assessments, such as the Center for Epidemiologic Studies Depression Scale (CES-D; Radloff, 1977)<sup>9</sup>, the Trait Anxiety Inventory (Spielberger, 1983)<sup>10</sup>, the K-6 Distress Scale (Kessler et al., 2002)<sup>11</sup>, and the Brief Symptom Inventory (BSI; Derogatis & Melisaratos, 1983)<sup>12</sup>, but also through the Parenting Stress Index-Short Form (PSI; Abidin, 1995)<sup>13</sup>.

**Household-level outcomes****Parent-child relationship quality**

Parent-child relationship quality is an indicator of either the child or parent's perception of the quality of their relationship. It is typically measured through semi-structured interviews, structured interviews, or standardized observational assessments, such as the Fictional Vacation Task (Grotevant & Cooper, 1985)<sup>14</sup> and the Etch-A-Sketch task (Stevenson-Hinde & Shouldice, 1995)<sup>15</sup>.

**Couple relationship satisfaction**

“Satisfaction” is an “individual's subjective evaluation of a relationship”. Thus, couple relationship satisfaction refers to the subjective evaluation of the relationship between husband and wife. It is generally assessed through structured interviews and standardized scales, such as the Dyadic Adjustment Scale (DAS; Spanier, 1976)<sup>16</sup> and the Golombok Rust Inventory of Marital State (Rust et al., 2010)<sup>17</sup>, which measure the relationship satisfaction, affection, consensus, cohesion, dyadic adjustment or intimate relationships of couple.

**Family functioning**

Family functioning refers to the ability of family members to support, communicate, cooperate and help each other, and bear life events and pressure sources together. Levels of family functioning are evaluated using the Family Function Style Scale (FFSS, Trivette et al., 1994)<sup>18</sup>, the Family Adaptability and Cohesion Evaluation IV Scale (FACES-IV)<sup>19</sup>, or the Family Assessment Device (FAD, Epstein, Baldwin, & Bishop, 1983)<sup>20</sup>, as well as all instruments that use parent self-reports to measure aspects of family function.

**Social support**

Social support refers to perceive informal or formal support from other family members, friends/acquaintances, neighbors, or official authorities (e.g., teacher, community doctor, parenting nurse, general practitioner, or psychologist) who are useful to help parents to deal with child rearing problem (e.g., inaccessible services, insufficient support in the adoption process, lack of relevant laws, and lack

of parenting experience). Social support is measured through open-ended interview questions or normal questionnaire, such as the measures of perceived social support from friends and from family (Procidano & Heller, 1983)<sup>21</sup> and the Parenting and Child Rearing Support Questionnaire (Dekovic et al., 1996)<sup>22</sup>.

#### **Other outcomes that can not be grouped into themes**

Given that for many outcomes cannot be combined, thus we described them using a term entitled “other outcomes”. They are children’s substance use, parental self-agency, parental school involvement, preschool selection considerations and experiences of school mistreatment, parent-school relationships, etc. We believe that they are necessary and informative though relatively few studies reported those related outcomes.

**6. Table S4a. Data and outcome measures of each study included in quasi meta-analysis for children's psychological adjustment**

| Study                 | Outcome measure                | Sexual minority |       |      | Heterosexual |       |       | SMD   |
|-----------------------|--------------------------------|-----------------|-------|------|--------------|-------|-------|-------|
|                       |                                | n               | M     | SD   | n            | M     | SD    |       |
| Farr (2010), 1        | 1.5–5 years internalizing CBCL | 56              | 42.75 | 9.80 | 50           | 44.03 | 9.39  | −0.13 |
| Farr (2010), 2        | 1.5–5 years externalizing CBCL | 56              | 45.80 | 9.49 | 50           | 47.21 | 8.31  | −0.16 |
| Farr (2010), 3        | 1.5–5 years internalizing TRF  | 56              | 45.10 | 8.31 | 50           | 45.66 | 8.97  | −0.06 |
| Farr (2010), 4        | 1.5–5 years externalizing TRF  | 56              | 49.73 | 7.83 | 50           | 50.72 | 9.48  | −0.11 |
| Goldberg (2017), 1    | T2 internalizing CBCL          | 107             | 47.65 | 2.04 | 67           | 49.98 | 10.53 | −0.35 |
| Goldberg (2017), 2    | T2 externalizing CBCL          | 107             | 48.13 | 1.64 | 67           | 48.28 | 8.45  | −0.03 |
| Averett (2009), 1     | 1.5–5 years internalizing CBCL | 86              | 5.53  | 4.26 | 294          | 6.79  | 7.30  | −0.19 |
| Averett (2009), 2     | 1.5–5 years externalizing CBCL | 86              | 7.88  | 5.06 | 294          | 10.28 | 9.28  | −0.28 |
| Baiocco (2018), 1     | Prosocial behavior SDQ         | 195             | −4.98 | 2.62 | 195          | −5.33 | 2.81  | 0.13  |
| Baiocco (2018) 1 2    | Total problem behavior SDQ     | 195             | 6.55  | 4.13 | 195          | 8.14  | 4.72  | −0.36 |
| Bos (2007), 1         | 4–18 years internalizing CBCL  | 100             | 5.94  | 4.40 | 100          | 6.61  | 5.68  | −0.13 |
| Bos (2007), 2         | 4–18 years externalizing CBCL  | 100             | 8.37  | 6.59 | 100          | 8.96  | 6.97  | −0.09 |
| Golombok (2014), 1    | Conduct problems Parent SDQ    | 81              | 2.22  | 2.08 | 49           | 2.90  | 1.80  | −0.34 |
| Golombok (2014), 2    | Hyperactivity Parent SDQ       | 81              | 4.33  | 2.45 | 49           | 5.18  | 2.79  | −0.33 |
| Golombok (2014), 3    | Emotional problems Parent SDQ  | 81              | 1.73  | 2.21 | 49           | 1.98  | 1.77  | −0.12 |
| Golombok (2014), 4    | Peer problems Parent SDQ       | 81              | 1.76  | 1.71 | 49           | 1.51  | 1.68  | 0.15  |
| Gartrell (2010), 1    | 6–18 years internalizing CBCL  | 78              | 5.40  | 5.90 | 93           | 5.40  | 5.60  | 0.00  |
| Gartrell (2010), 2    | 6–18 years externalizing CBCL  | 78              | 4.10  | 5.20 | 93           | 6.60  | 7.80  | −0.37 |
| Averett (2009), 1     | 6–18 years internalizing CBCL  | 69              | 6.94  | 7.18 | 935          | 6.81  | 7.06  | 0.02  |
| Averett (2009), 2     | 6–18 years externalizing CBCL  | 69              | 8.57  | 9.78 | 935          | 11.45 | 11.70 | −0.25 |
| McConnachie (2021), 1 | Internalizing SDQ              | 68              | 5.94  | 4.83 | 43           | 5.40  | 1.54  | 0.14  |
| McConnachie (2021), 2 | Externalizing SDQ              | 68              | 8.20  | 5.44 | 43           | 8.96  | 6.68  | −0.13 |
| Bos (2018), 1         | Total problem behavior SDQ     | 95              | 5.58  | 5.55 | 95           | 5.65  | 4.55  | −0.01 |
| Bos (2010), 2         | Global self-worthg PCSC        | 63              | −3.16 | 0.39 | 68           | −3.14 | 0.41  | −0.05 |



|                 |                           |     |       |      |       |       |      |       |
|-----------------|---------------------------|-----|-------|------|-------|-------|------|-------|
| Bos (2010), 3   | Social competence PCSC    | 63  | −2.96 | 0.44 | 68    | −2.99 | 0.40 | 0.07  |
| Calzo (2019), 1 | Six-item version of SFSDQ | 296 | 2.42  | 1.94 | 20807 | 1.81  | 2.88 | 0.21  |
| Bos (2015), 1   | Self-esteem RSES          | 51  | −3.18 | 0.50 | 51    | −2.94 | 0.43 | −0.51 |
| Bos (2015), 2   | Social anxiety SIAS       | 51  | 1.79  | 0.54 | 51    | 2.00  | 0.71 | −0.33 |
| Bos (2015), 3   | Conduct problems YSR      | 51  | 3.10  | 2.73 | 51    | 4.67  | 3.75 | −0.48 |

### 7. Table S4b. Data and outcome measures of each study included in quasi meta-analysis for parental mental health

| Study                 | Outcome measure                                       | Sexual minority |       |      | Heterosexual |       |      | SMD   |
|-----------------------|-------------------------------------------------------|-----------------|-------|------|--------------|-------|------|-------|
|                       |                                                       | n               | M     | SD   | n            | M     | SD   |       |
| Gelderer (2018), 1    | The Edinburgh Postnatal Depression Inventory          | 198             | 4.37  | 2.94 | 82           | 4.55  | 2.92 | −0.06 |
| Gelderer (2018), 2    | The State-Trait Anxiety Inventory— adult version      | 198             | 33.16 | 7.48 | 82           | 33.45 | 7.69 | −0.04 |
| Golombok (2014), 1    | The Edinburgh Depression Scale                        | 81              | 5.06  | 3.57 | 49           | 5.94  | 4.1  | −0.23 |
| Golombok (2014), 2    | The Trait Anxiety Inventory                           | 81              | 34.93 | 8.49 | 49           | 36.70 | 8.98 | −0.20 |
| Goldberg (2017), 1    | The Center for Epidemiologic Studies Depression Scale | 107             | 0.46  | 0.39 | 67           | 0.48  | 0.41 | −0.05 |
| McConnachie (2021), 1 | Anxiety and depression scores                         | 68              | 21.11 | 6.66 | 43           | 21.85 | 7.94 | −0.10 |
| Farr (2020), 1        | The Brief Symptom Inventory                           | 112             | 0.30  | 0.26 | 97           | 0.29  | 0.24 | 0.04  |
| Calzo (2019), 1       | The K-6 Distress Scale                                | 296             | 4.81  | 6.91 | 20807        | 2.65  | 5.77 | 0.37  |

### 8. Table S4c. Data and outcome measures of each study included in quasi meta-analysis for parenting stress

| Study              | Outcome measure                  | Sexual minority |       |       | Heterosexual |       |       | SMD   |
|--------------------|----------------------------------|-----------------|-------|-------|--------------|-------|-------|-------|
|                    |                                  | n               | M     | SD    | n            | M     | SD    |       |
| Farr (2017), 1     | Short Form PSI (Abidin, 1995)    | 103             | 66.99 | 16.94 | 81           | 65.26 | 14.69 | 0.11  |
| Gelderer (2018), 1 | Short Form PSI (Abidin, 2012)    | 198             | 21.78 | 8.76  | 82           | 22.30 | 5.26  | −0.07 |
| Golombok (2014), 1 | Short Form PSI/SF (Abidin, 1990) | 81              | 68.23 | 17.83 | 49           | 75.86 | 19.85 | −0.41 |

|               |                                                         |    |      |      |    |      |      |       |
|---------------|---------------------------------------------------------|----|------|------|----|------|------|-------|
| Bos (2018), 1 | Perceived problems in the parent-child relationship PSQ | 95 | 1.45 | 0.47 | 95 | 1.51 | 0.46 | -0.13 |
| Bos (2018), 1 | Perceived parental competency PSQ                       | 95 | 1.53 | 0.67 | 95 | 1.47 | 0.61 | 0.09  |
| Bos (2016), 1 | 3 items to assess the stress of parenting               | 95 | 2.16 | 0.78 | 95 | 1.89 | 0.52 | 0.41  |

**9. Table S4d. Data and outcome measures of each study included in quasi meta-analysis for parent-child relationship**

| Study              | Outcome measure                                    | Sexual minority |       |      | Heterosexual |       |      | SMD   |
|--------------------|----------------------------------------------------|-----------------|-------|------|--------------|-------|------|-------|
|                    |                                                    | n               | M     | SD   | n            | M     | SD   |       |
| Farr (2020), 1     | The Inventory of Parent and Peer Attachment (IPPA) | 99              | 4.43  | 0.48 | 80           | 4.49  | 0.47 | -0.13 |
| Bos (2015), 1      | Adolescent-parent relationship quality IPPA        | 51              | 3.16  | 0.37 | 51           | 3.22  | 0.46 | -0.14 |
| Bos (2015), 2      | Parental controlling behavior IPPA                 | 51              | 3.29  | 0.79 | 51           | 3.38  | 0.89 | -0.11 |
| Bos (2015), 3      | Adolescent disclosure IPPA                         | 51              | 3.18  | 0.40 | 51           | 3.13  | 0.59 | 0.10  |
| Bos (2016), 1      | one item assessed the parent-child relationship    | 95              | 3.69  | 0.57 | 95           | 3.71  | 0.54 | -0.35 |
| Farr (2013), 1     | The Coparenting Behavior Coding scale-supportive   | 54              | 2.82  | 0.61 | 50           | 2.87  | 0.56 | -0.08 |
| Farr (2013), 2     | The Coparenting Behavior Coding scale -undermining | 54              | -1.44 | 0.38 | 50           | -1.67 | 0.37 | 0.61  |
| Golombok (2014), 1 | Expressed warmth                                   | 81              | 3.84  | 0.85 | 40           | 3.66  | 0.76 | 0.22  |
| Golombok (2014), 2 | Sensitive responding                               | 81              | 2.87  | 0.69 | 40           | 2.69  | 0.66 | 0.26  |
| Golombok (2014), 3 | Enjoyment of play                                  | 81              | 3.29  | 0.74 | 40           | 3.14  | 0.77 | 0.20  |
| Golombok (2014), 4 | Amount of interaction                              | 81              | 2.55  | 0.54 | 40           | 2.35  | 0.58 | 0.36  |

|                       |                         |    |       |      |    |       |      |       |
|-----------------------|-------------------------|----|-------|------|----|-------|------|-------|
| Golombok (2014), 5    | Quality of interaction  | 81 | 3.3   | 0.62 | 40 | 3.13  | 0.62 | 0.27  |
| Golombok (2014), 6    | Frequency of battle     | 81 | -3.07 | 1.15 | 40 | -3.48 | 1.21 | 0.35  |
| Golombok (2014), 7    | Level of battle         | 81 | -1.68 | 0.77 | 40 | -1.65 | 0.77 | -0.04 |
| Golombok (2014), 8    | Disciplinary indulgence | 81 | -1.39 | 0.72 | 40 | -1.64 | 0.66 | 0.35  |
| Golombok (2014), 9    | Disciplinary aggression | 81 | -1.21 | 0.67 | 40 | -1.38 | 0.63 | 0.26  |
| Golombok (2014), 10   | Child responsiveness    | 81 | 5.75  | 0.69 | 40 | 5.65  | 0.95 | 0.13  |
| Golombok (2014), 11   | Parent responsiveness   | 81 | 6.41  | 0.62 | 40 | 6.28  | 0.64 | 0.21  |
| Golombok (2014), 12   | Dyadic reciprocity      | 81 | 2.21  | 0.94 | 40 | 2.24  | 0.93 | -0.03 |
| Golombok (2014), 13   | Dyadic cooperation      | 81 | 2.73  | 0.96 | 40 | 2.65  | 1.02 | 0.08  |
| McConnachie (2021), 1 | Sensitivity             | 68 | 2.78  | 0.90 | 43 | 2.58  | 1.05 | 0.21  |
| McConnachie (2021), 2 | Warmth                  | 68 | 4.02  | 1.22 | 43 | 4.09  | 1.38 | -0.05 |
| McConnachie (2021), 3 | Interaction quality     | 68 | 2.87  | 0.90 | 43 | 2.72  | 0.98 | 0.16  |
| McConnachie (2021), 4 | Criticism               | 68 | 1.91  | 0.86 | 43 | 1.91  | 1.05 | 0.00  |
| McConnachie (2021), 5 | Parent responsiveness   | 68 | 6.28  | 0.81 | 43 | 6.07  | 0.92 | 0.24  |
| McConnachie (2021), 6 | Child responsiveness    | 68 | 6.07  | 1.10 | 43 | 5.97  | 1.31 | 0.08  |
| McConnachie (2021), 7 | Dyadic reciprocity      | 68 | 3.91  | 1.10 | 43 | 3.48  | 1.31 | 0.36  |
| McConnachie (2021), 8 | Dyadic co-operation     | 68 | 5.89  | 1.46 | 43 | 5.88  | 1.77 | 0.01  |

**10. Table S4e. Data and outcome measures of each study included in quasi meta-analysis for couple relationship satisfaction**

| Study              | Outcome measure                                        | Sexual minority |        |       | Heterosexual |        |       | SMD   |
|--------------------|--------------------------------------------------------|-----------------|--------|-------|--------------|--------|-------|-------|
|                    |                                                        | n               | M      | SD    | n            | M      | SD    |       |
| Farr (2010), 1     | Total relationship adjustment DAS                      | 56              | 116.71 | 13.27 | 50           | 116.85 | 13.06 | -0.01 |
| Baiocco (2018), 1  | Total relationship adjustment DAS                      | 195             | 115.96 | 11.58 | 195          | 102.59 | 15.08 | 0.99  |
| Gelderer (2018), 1 | The Golombok Rust Inventory of Marital State           | 198             | -20.41 | 8.79  | 82           | -22.05 | 7.35  | 0.19  |
| Bos (2016), 1      | A single question assessed spouse/partner relationship | 95              | 3.16   | 0.65  | 95           | 3.12   | 0.73  | 0.06  |

|               |                       |     |      |      |     |      |      |      |
|---------------|-----------------------|-----|------|------|-----|------|------|------|
| Bos (2007), 1 | A subscale of the PSI | 100 | 4.53 | 0.72 | 100 | 4.53 | 0.78 | 0.00 |
|---------------|-----------------------|-----|------|------|-----|------|------|------|

**11. Table S4f. Data and outcome measures of each study included in quasi meta-analysis for family functioning**

| Study             | Outcome measure                 | Sexual minority |        |       | Heterosexual |        |       | SMD   |
|-------------------|---------------------------------|-----------------|--------|-------|--------------|--------|-------|-------|
|                   |                                 | n               | M      | SD    | n            | M      | SD    |       |
| Farr (2017), 1    | Family functioning (FAD)        | 103             | -1.74  | 0.32  | 81           | -1.80  | 0.35  | 0.18  |
| Averett (2009), 1 | 1.5 to 5 Years FFSS total score | 86              | 110.16 | 11.19 | 294          | 111.98 | 13.85 | -0.14 |
| Averett (2009), 2 | 6 to 18 Years FFSS total score  | 69              | 105.49 | 11.52 | 935          | 109.37 | 14.38 | -0.27 |
| Baiocco (2018), 1 | Family cohesion                 | 195             | 2.85   | 0.77  | 195          | 2.34   | 0.88  | 0.62  |
| Baiocco (2018), 2 | Family flexibility              | 195             | 1.99   | 0.68  | 195          | 1.68   | 0.57  | 0.49  |
| Farr (2010), 1    | Parenting Discipline (PS Total) | 56              | -2.53  | 0.46  | 50           | -2.60  | 0.46  | 0.15  |

12. Figure S5a. Sensitivity analysis for children’s psychological adjustment

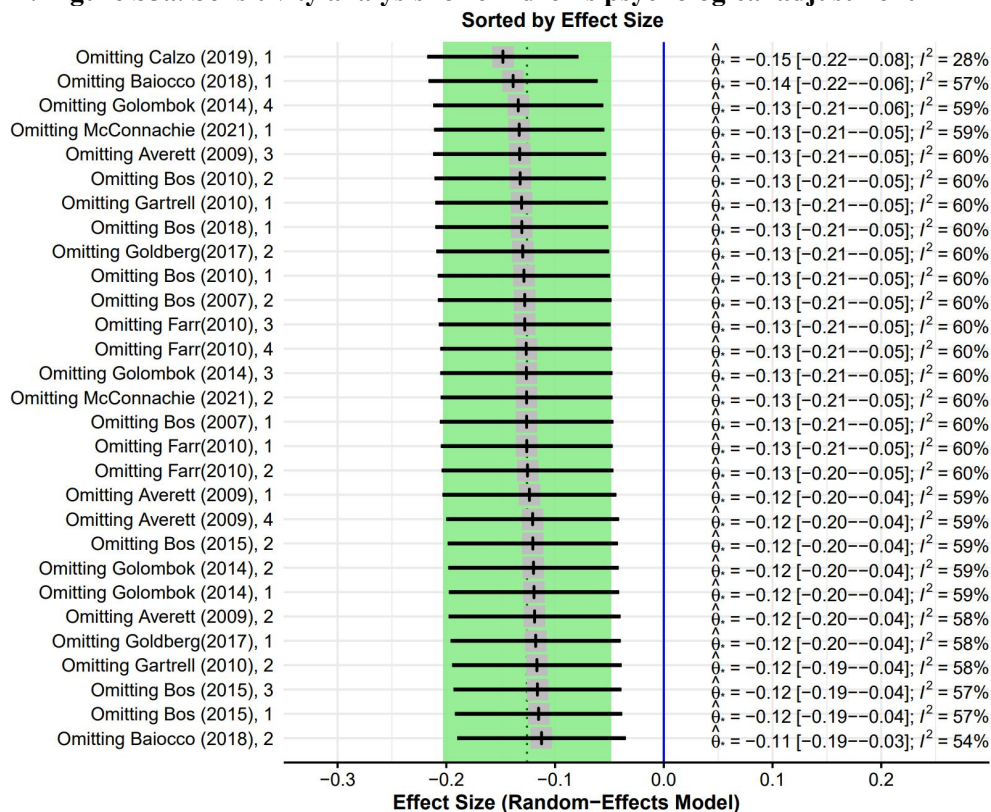

Omitting Calzo (2019):

| Study                 | Sexual minority |      | Heterosexual |       | Total | Weight      | Std. Mean Difference |                             | Std. Mean Difference<br>IV, Fixed, 95% CI |
|-----------------------|-----------------|------|--------------|-------|-------|-------------|----------------------|-----------------------------|-------------------------------------------|
|                       | Mean            | SD   | Total Mean   | SD    |       |             | IV, Fixed, 95% CI    | IV, Fixed, 95% CI           |                                           |
| Farr(2010), 1         | 42.75           | 9.80 | 56           | 44.03 | 9.39  | 50          | 2.2%                 | -0.13 [-0.51; 0.25]         |                                           |
| Farr(2010), 2         | 45.80           | 9.49 | 56           | 47.21 | 8.31  | 50          | 2.2%                 | -0.16 [-0.54; 0.23]         |                                           |
| Farr(2010), 3         | 45.10           | 8.31 | 56           | 45.66 | 8.97  | 50          | 2.2%                 | -0.06 [-0.45; 0.32]         |                                           |
| Farr(2010), 4         | 49.73           | 7.83 | 56           | 50.72 | 9.48  | 50          | 2.2%                 | -0.11 [-0.50; 0.27]         |                                           |
| Goldberg(2017), 1     | 47.65           | 2.04 | 107          | 49.98 | 10.53 | 67          | 3.4%                 | -0.35 [-0.65; -0.04]        |                                           |
| Goldberg(2017), 2     | 48.13           | 1.64 | 107          | 48.28 | 8.45  | 67          | 3.5%                 | -0.03 [-0.33; 0.28]         |                                           |
| Bos (2007), 1         | 5.94            | 4.40 | 100          | 6.61  | 5.68  | 100         | 4.2%                 | -0.13 [-0.41; 0.15]         |                                           |
| Bos (2007), 2         | 8.37            | 6.59 | 100          | 8.96  | 6.97  | 100         | 4.2%                 | -0.09 [-0.36; 0.19]         |                                           |
| Gartrell (2010), 1    | 5.40            | 5.90 | 78           | 5.40  | 5.60  | 93          | 3.6%                 | 0.00 [-0.30; 0.30]          |                                           |
| Gartrell (2010), 2    | 4.10            | 5.20 | 78           | 6.60  | 7.80  | 93          | 3.5%                 | -0.37 [-0.67; -0.07]        |                                           |
| Averett (2009), 1     | 5.53            | 4.26 | 86           | 6.79  | 7.30  | 294         | 5.6%                 | -0.19 [-0.43; 0.05]         |                                           |
| Averett (2009), 2     | 7.88            | 5.06 | 86           | 10.28 | 9.28  | 294         | 5.6%                 | -0.28 [-0.52; -0.04]        |                                           |
| Averett (2009), 3     | 6.94            | 7.18 | 69           | 6.81  | 7.06  | 935         | 5.4%                 | 0.02 [-0.23; 0.26]          |                                           |
| Averett (2009), 4     | 8.57            | 9.78 | 69           | 11.45 | 11.70 | 935         | 5.4%                 | -0.25 [-0.49; -0.00]        |                                           |
| McConnachie (2021), 1 | 5.94            | 4.83 | 68           | 5.40  | 1.54  | 43          | 2.2%                 | 0.14 [-0.25; 0.52]          |                                           |
| McConnachie (2021), 2 | 8.20            | 5.44 | 68           | 8.96  | 6.68  | 43          | 2.2%                 | -0.13 [-0.51; 0.26]         |                                           |
| Bos (2018), 1         | 5.58            | 5.55 | 95           | 5.65  | 4.55  | 95          | 4.0%                 | -0.01 [-0.30; 0.27]         |                                           |
| Baiocco (2018), 1     | -4.98           | 2.62 | 195          | -5.33 | 2.81  | 195         | 8.2%                 | 0.13 [-0.07; 0.33]          |                                           |
| Baiocco (2018), 2     | 6.55            | 4.13 | 195          | 8.14  | 4.72  | 195         | 8.1%                 | -0.36 [-0.56; -0.16]        |                                           |
| Golombok (2014), 1    | 2.22            | 2.08 | 81           | 2.90  | 1.80  | 49          | 2.5%                 | -0.34 [-0.70; 0.02]         |                                           |
| Golombok (2014), 2    | 4.33            | 2.45 | 81           | 5.18  | 2.79  | 49          | 2.5%                 | -0.33 [-0.68; 0.03]         |                                           |
| Golombok (2014), 3    | 1.73            | 2.21 | 81           | 1.98  | 1.77  | 49          | 2.6%                 | -0.12 [-0.48; 0.23]         |                                           |
| Golombok (2014), 4    | 1.76            | 1.71 | 81           | 1.51  | 1.68  | 49          | 2.6%                 | 0.15 [-0.21; 0.50]          |                                           |
| Bos (2010), 1         | -3.16           | 0.39 | 63           | -3.14 | 0.41  | 68          | 2.8%                 | -0.05 [-0.39; 0.29]         |                                           |
| Bos (2010), 2         | -2.96           | 0.44 | 63           | -2.99 | 0.40  | 68          | 2.8%                 | 0.07 [-0.27; 0.41]          |                                           |
| Bos (2015), 1         | -3.18           | 0.50 | 51           | -2.94 | 0.43  | 51          | 2.1%                 | -0.51 [-0.91; -0.12]        |                                           |
| Bos (2015), 2         | 1.79            | 0.54 | 51           | 2.00  | 0.71  | 51          | 2.1%                 | -0.33 [-0.72; 0.06]         |                                           |
| Bos (2015), 3         | 3.10            | 2.73 | 51           | 4.67  | 3.75  | 51          | 2.1%                 | -0.48 [-0.87; -0.08]        |                                           |
| <b>Total (95% CI)</b> |                 |      | <b>2328</b>  |       |       | <b>4234</b> | <b>100.0%</b>        | <b>-0.15 [-0.20; -0.09]</b> |                                           |

Heterogeneity: Tau<sup>2</sup> = 0.0103; Chi<sup>2</sup> = 37.32, df = 27 (P = 0.09); I<sup>2</sup> = 28%

Omitting Baiocco (2018):

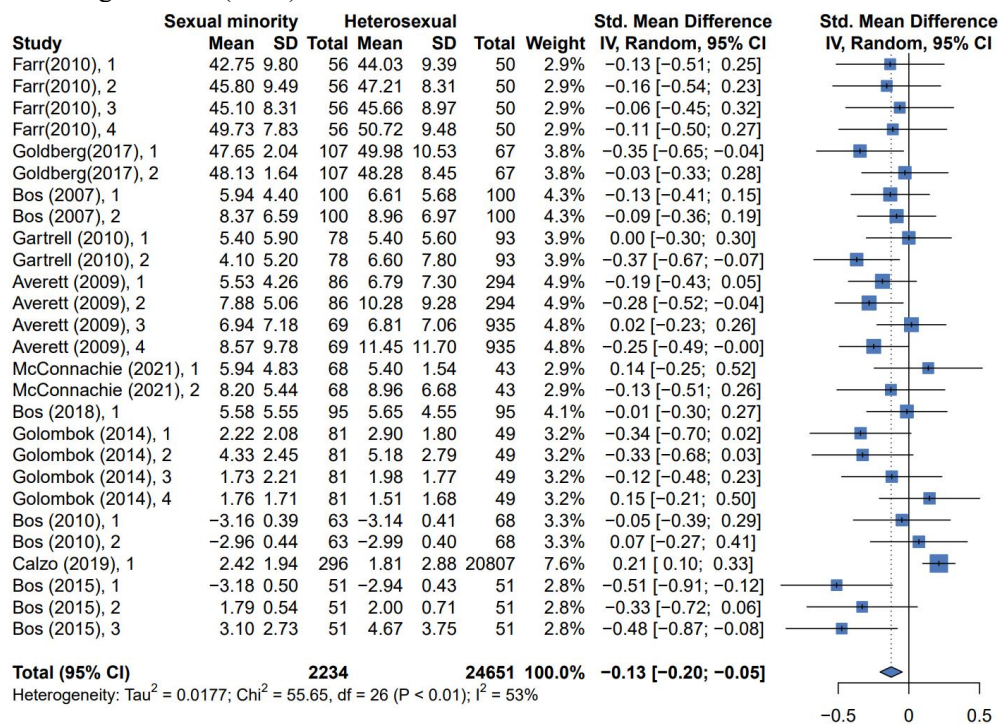

13. Figure S5b. Sensitivity analysis for parental mental health

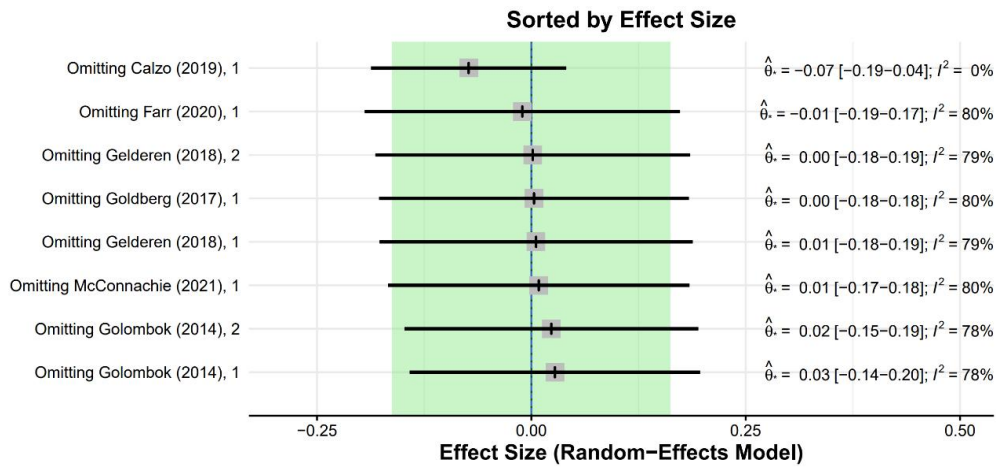

Omitting Calzo (2019):

| Study                 | Sexual minority |      | Heterosexual |       | Total | Weight     | Std. Mean Difference IV, Fixed, 95% CI |                     |                            |
|-----------------------|-----------------|------|--------------|-------|-------|------------|----------------------------------------|---------------------|----------------------------|
|                       | Mean            | SD   | Mean         | SD    |       |            |                                        |                     |                            |
| Gelderen (2018), 1    | 4.37            | 2.94 | 198          | 4.55  | 2.92  | 82         | 19.6%                                  | -0.06 [-0.32; 0.20] |                            |
| Gelderen (2018), 2    | 33.16           | 7.48 | 198          | 33.45 | 7.69  | 82         | 19.6%                                  | -0.04 [-0.30; 0.22] |                            |
| Golombok (2014), 1    | 5.06            | 3.57 | 81           | 5.94  | 4.10  | 49         | 10.2%                                  | -0.23 [-0.59; 0.12] |                            |
| Golombok (2014), 2    | 34.93           | 8.49 | 81           | 36.70 | 8.98  | 49         | 10.3%                                  | -0.20 [-0.56; 0.15] |                            |
| Goldberg (2017), 1    | 0.46            | 0.39 | 107          | 0.48  | 0.41  | 67         | 13.9%                                  | -0.05 [-0.36; 0.26] |                            |
| McConnachie (2021), 1 | 21.11           | 6.66 | 68           | 21.85 | 7.94  | 43         | 8.9%                                   | -0.10 [-0.48; 0.28] |                            |
| Farr (2020), 1        | 0.30            | 0.26 | 112          | 0.29  | 0.24  | 97         | 17.6%                                  | 0.04 [-0.23; 0.31]  |                            |
| <b>Total (95% CI)</b> |                 |      | <b>845</b>   |       |       | <b>469</b> | <b>100.0%</b>                          |                     | <b>-0.07 [-0.19; 0.04]</b> |

Heterogeneity: Tau<sup>2</sup> = 0; Chi<sup>2</sup> = 2.06, df = 6 (P = 0.91); I<sup>2</sup> = 0%

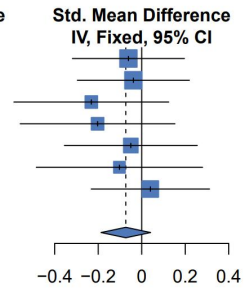

14. Figure S5c. Sensitivity analysis for parenting stress

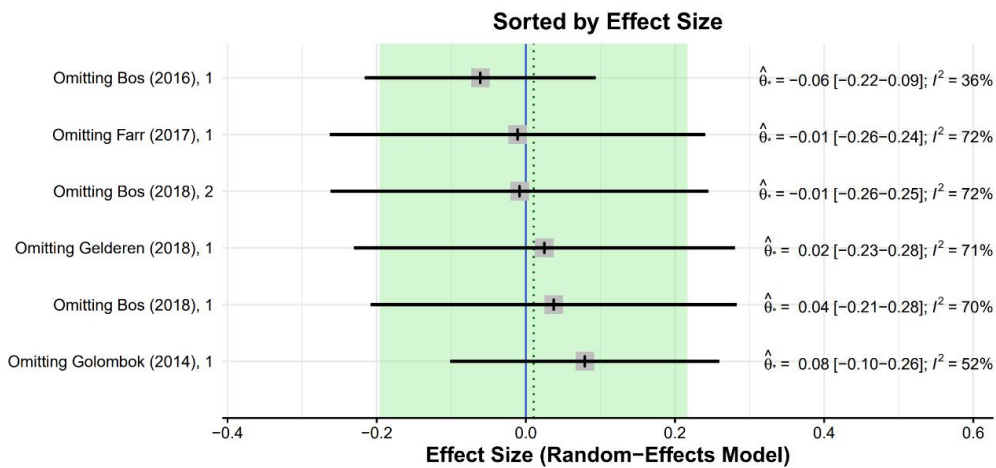

15. Figure S5d. Sensitivity analysis for parent-child relationship

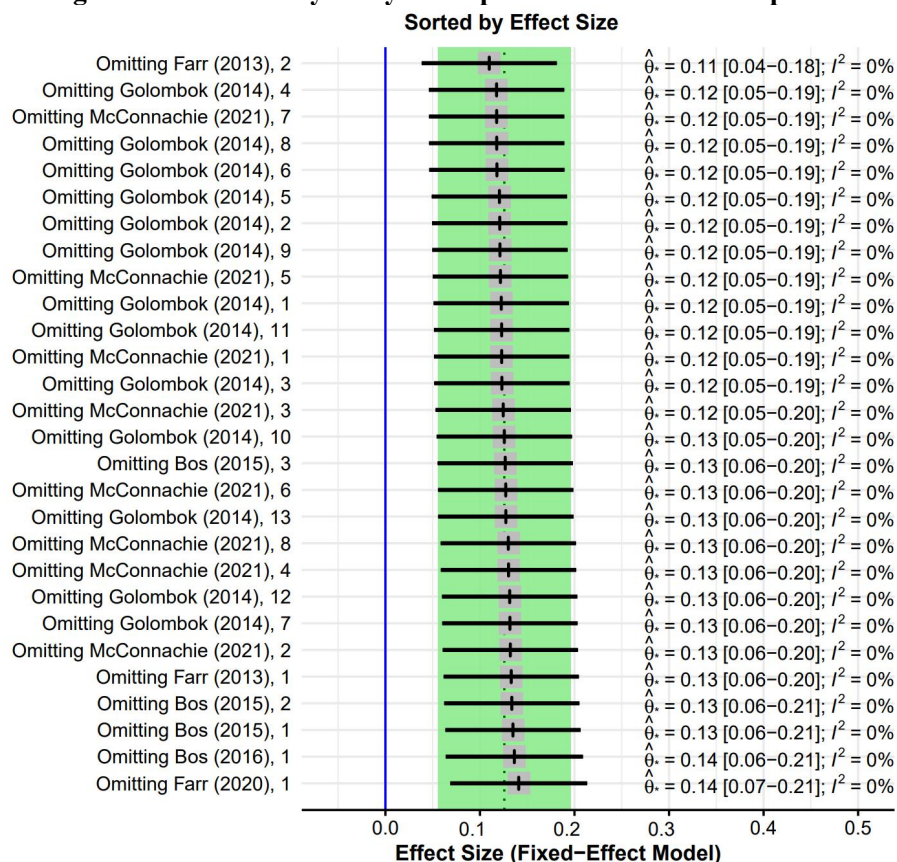

15. Figure S5e. Sensitivity analysis for couple relationship satisfaction

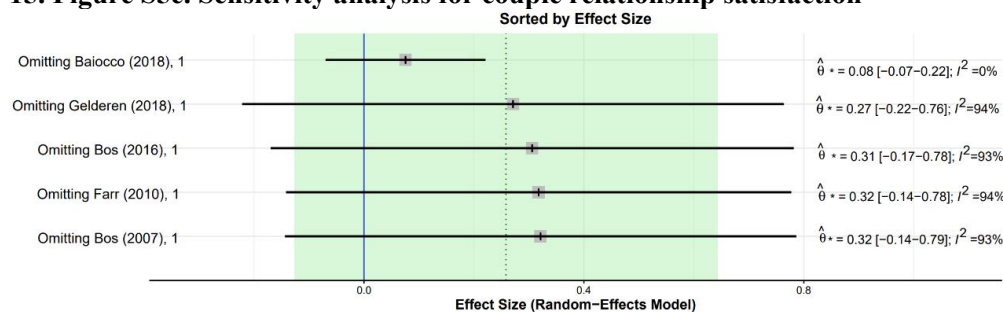

Omitting Baiocco (2018):

| Study                 | Sexual minority |       |            | Heterosexual |       |            | Weight        | Std. Mean Difference<br>IV, Fixed, 95% CI |
|-----------------------|-----------------|-------|------------|--------------|-------|------------|---------------|-------------------------------------------|
|                       | Mean            | SD    | Total      | Mean         | SD    | Total      |               |                                           |
| Farr (2010), 1        | 116.71          | 13.27 | 56         | 116.85       | 13.06 | 50         | 14.5%         | -0.01 [-0.39; 0.37]                       |
| Gelderen (2018), 1    | -20.41          | 8.79  | 198        | -22.05       | 7.35  | 82         | 31.8%         | 0.19 [-0.06; 0.45]                        |
| Bos (2016), 1         | 3.16            | 0.65  | 95         | 3.12         | 0.73  | 95         | 26.1%         | 0.06 [-0.23; 0.34]                        |
| Bos (2007), 1         | 4.53            | 0.72  | 100        | 4.53         | 0.78  | 100        | 27.5%         | 0.00 [-0.28; 0.28]                        |
| <b>Total (95% CI)</b> |                 |       | <b>449</b> |              |       | <b>327</b> | <b>100.0%</b> | <b>0.08 [-0.07; 0.22]</b>                 |

Heterogeneity:  $\tau^2 = 0$ ;  $\chi^2 = 1.32$ ,  $df = 3$  ( $P = 0.72$ );  $I^2 = 0\%$

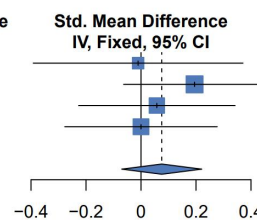



Omitting Bos (2016):

| Study                 | Sexual minority |       |       | Heterosexual      |       |       | Weight | Std. Mean Difference<br>IV, Fixed, 95% CI |
|-----------------------|-----------------|-------|-------|-------------------|-------|-------|--------|-------------------------------------------|
|                       | Mean            | SD    | Total | Mean              | SD    | Total |        |                                           |
| Farr (2017), 1        | 66.99           | 16.94 | 103   | 65.26             | 14.69 | 81    | 19.9%  | 0.11 [-0.18; 0.40]                        |
| Gelderen (2018), 1    | 21.78           | 8.76  | 198   | 22.30             | 5.26  | 82    | 25.4%  | -0.07 [-0.32; 0.19]                       |
| Golombok (2014), 1    | 68.23           | 17.83 | 81    | 75.86             | 19.85 | 49    | 13.1%  | -0.41 [-0.77; -0.05]                      |
| Bos (2018), 1         | 1.45            | 0.47  | 95    | 1.51              | 0.46  | 95    | 20.8%  | -0.13 [-0.41; 0.16]                       |
| Bos (2018), 2         | 1.53            | 0.67  | 95    | 1.47              | 0.61  | 95    | 20.8%  | 0.09 [-0.19; 0.38]                        |
| <b>Total (95% CI)</b> | <b>572</b>      |       |       | <b>402 100.0%</b> |       |       |        | <b>-0.06 [-0.19; 0.07]</b>                |

Heterogeneity: Tau<sup>2</sup> = 0.0090; Chi<sup>2</sup> = 6.22, df = 4 (P = 0.18); I<sup>2</sup> = 36%

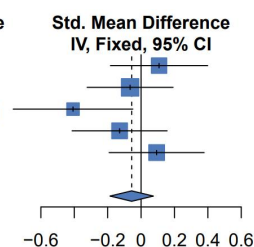

17. Figure S5f. Sensitivity analysis for family functioning

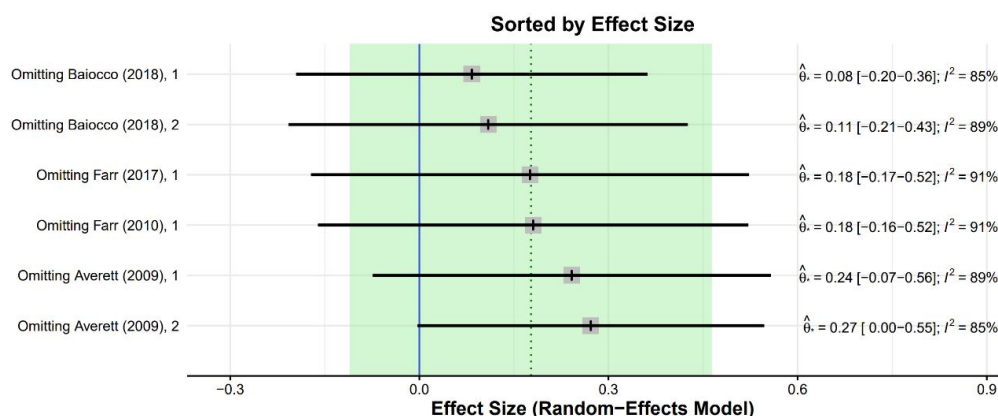

Omitting Baiocco (2018):

| Study                 | Sexual minority |       |       | Heterosexual       |       |       | Weight | Std. Mean Difference<br>IV, Random, 95% CI |
|-----------------------|-----------------|-------|-------|--------------------|-------|-------|--------|--------------------------------------------|
|                       | Mean            | SD    | Total | Mean               | SD    | Total |        |                                            |
| Farr (2017), 1        | -1.74           | 0.32  | 103   | -1.80              | 0.35  | 81    | 24.5%  | 0.18 [-0.11; 0.47]                         |
| Averett (2009), 1     | 110.16          | 11.19 | 86    | 111.98             | 13.85 | 294   | 28.6%  | -0.14 [-0.38; 0.10]                        |
| Averett (2009), 2     | 105.49          | 11.52 | 69    | 109.37             | 14.38 | 935   | 28.2%  | -0.27 [-0.52; -0.03]                       |
| Farr (2010), 1        | -2.53           | 0.46  | 56    | -2.60              | 0.46  | 50    | 18.7%  | 0.15 [-0.23; 0.53]                         |
| <b>Total (95% CI)</b> | <b>314</b>      |       |       | <b>1360 100.0%</b> |       |       |        | <b>-0.04 [-0.26; 0.17]</b>                 |

Heterogeneity: Tau<sup>2</sup> = 0.0283; Chi<sup>2</sup> = 7.03, df = 3 (P = 0.07); I<sup>2</sup> = 57%

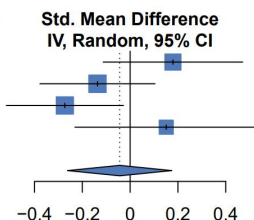

Omitting Averett (2009):

| Study                 | Sexual minority |      |       | Heterosexual      |      |       | Weight | Std. Mean Difference<br>IV, Random, 95% CI |
|-----------------------|-----------------|------|-------|-------------------|------|-------|--------|--------------------------------------------|
|                       | Mean            | SD   | Total | Mean              | SD   | Total |        |                                            |
| Farr (2017), 1        | -1.74           | 0.32 | 103   | -1.80             | 0.35 | 81    | 23.2%  | 0.18 [-0.11; 0.47]                         |
| Baiocco (2018), 1     | 2.85            | 0.77 | 195   | 2.34              | 0.88 | 195   | 29.3%  | 0.62 [0.41; 0.82]                          |
| Baiocco (2018), 2     | 1.99            | 0.68 | 195   | 1.68              | 0.57 | 195   | 29.4%  | 0.49 [0.29; 0.69]                          |
| Farr (2010), 1        | -2.53           | 0.46 | 56    | -2.60             | 0.46 | 50    | 18.0%  | 0.15 [-0.23; 0.53]                         |
| <b>Total (95% CI)</b> | <b>549</b>      |      |       | <b>521 100.0%</b> |      |       |        | <b>0.39 [0.17; 0.62]</b>                   |

Heterogeneity: Tau<sup>2</sup> = 0.0329; Chi<sup>2</sup> = 8.39, df = 3 (P = 0.04); I<sup>2</sup> = 64%

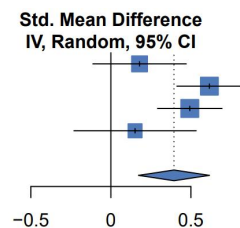

## 18. Figure S6. Subgroup analysis for children's psychological adjustment

## Subgroup by the access to child (adopted or biological)

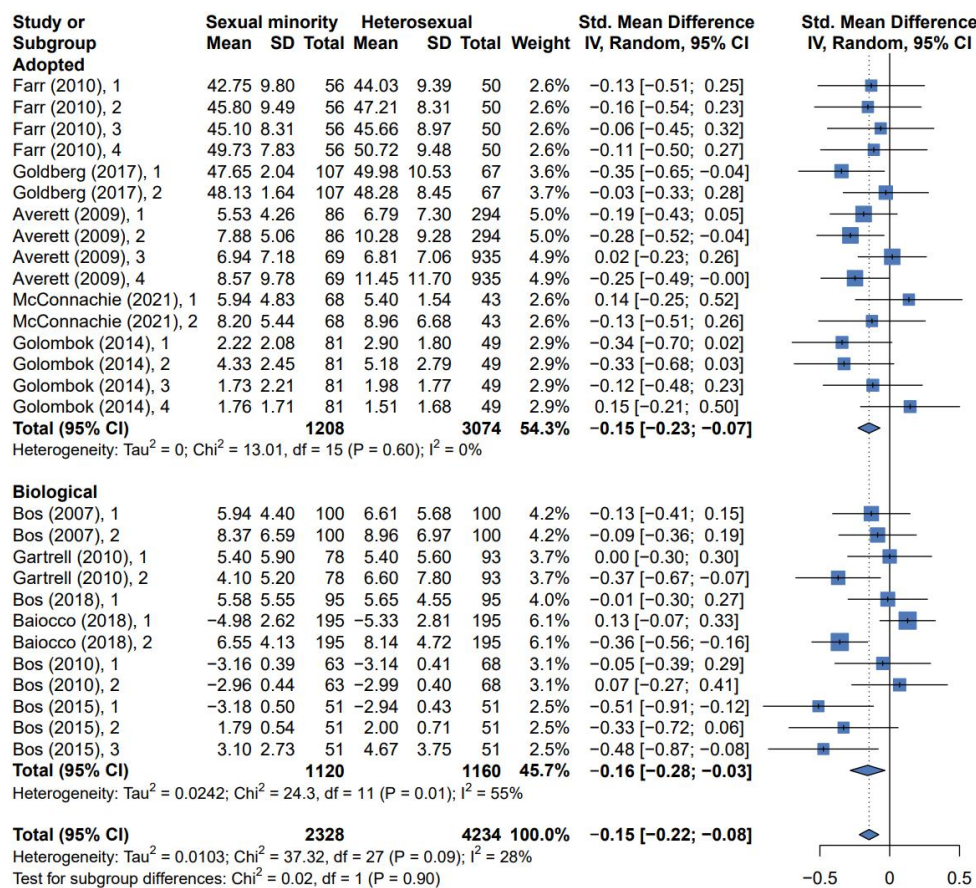

**Subgroup by types of behavioral problems (internalizing or externalizing)**

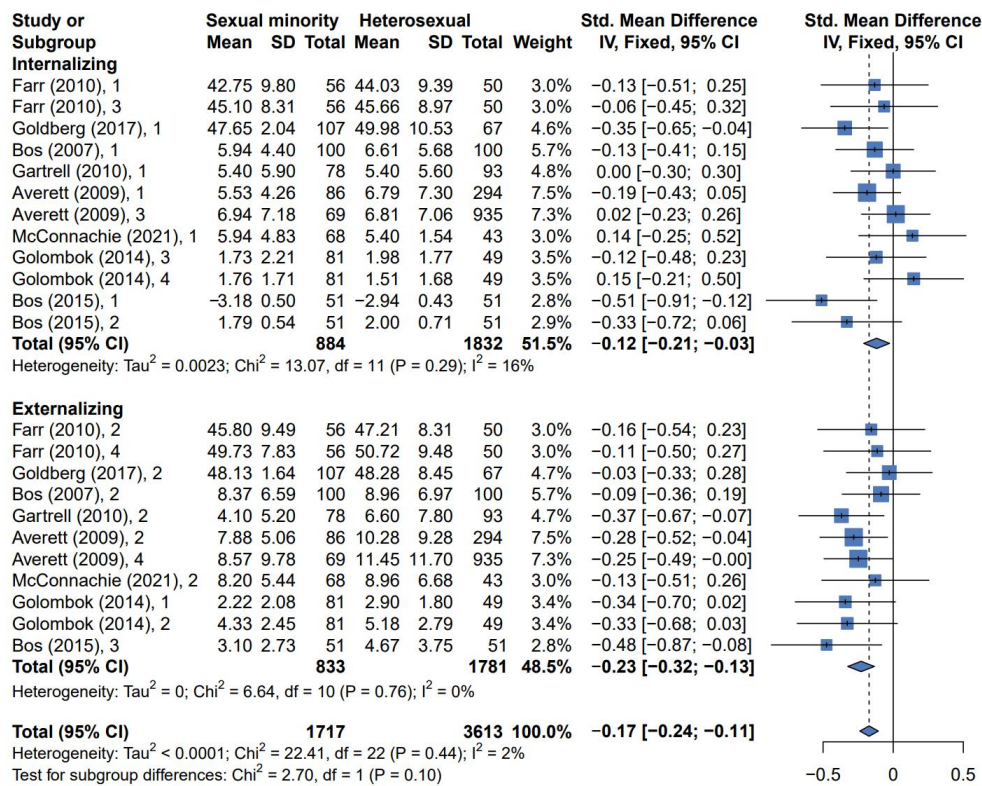

## Subgroup by country

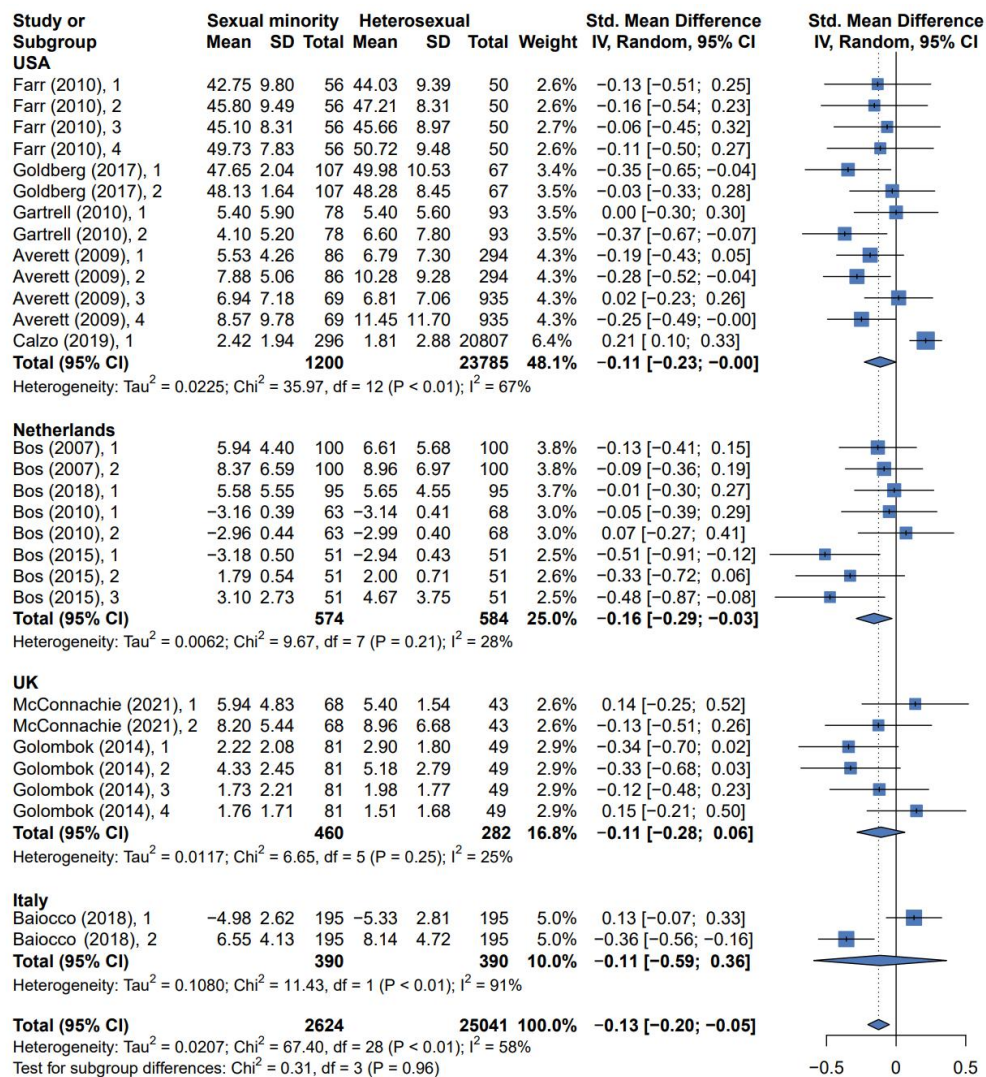

## Subgroup by region

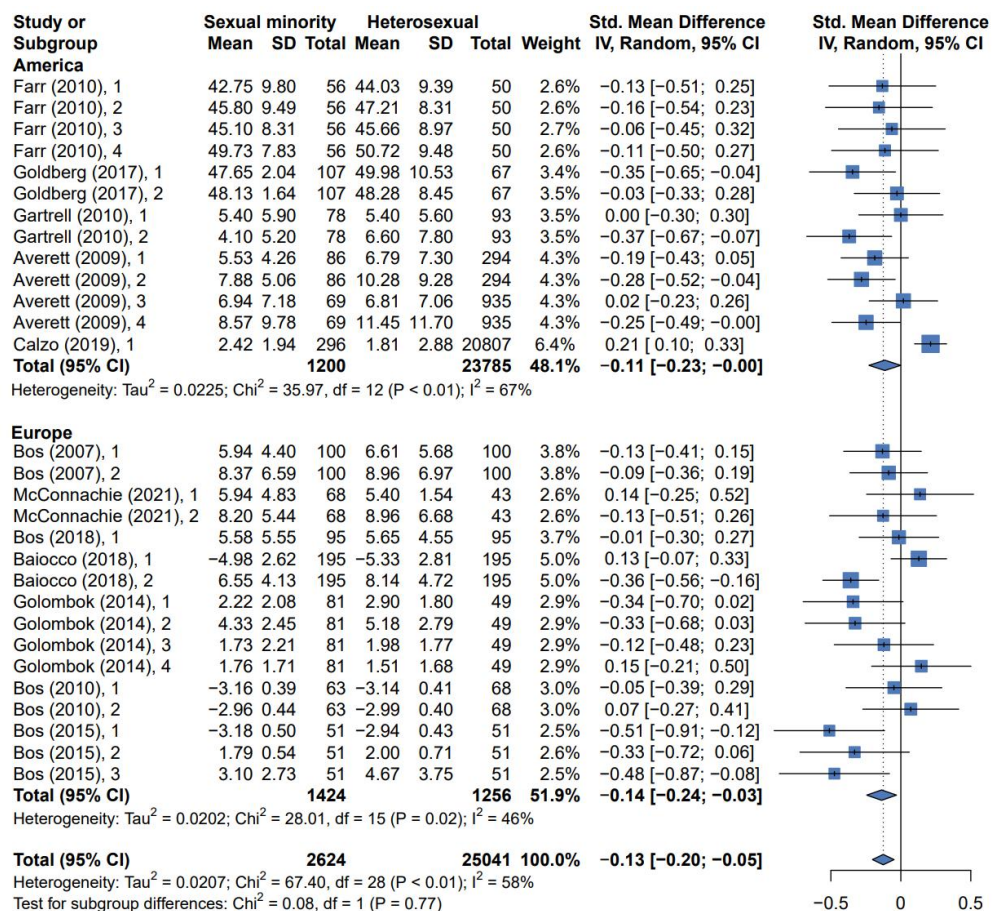

**19. Figure S7a Funnel plot for children's psychological adjustment ( $P < 0.05$ )**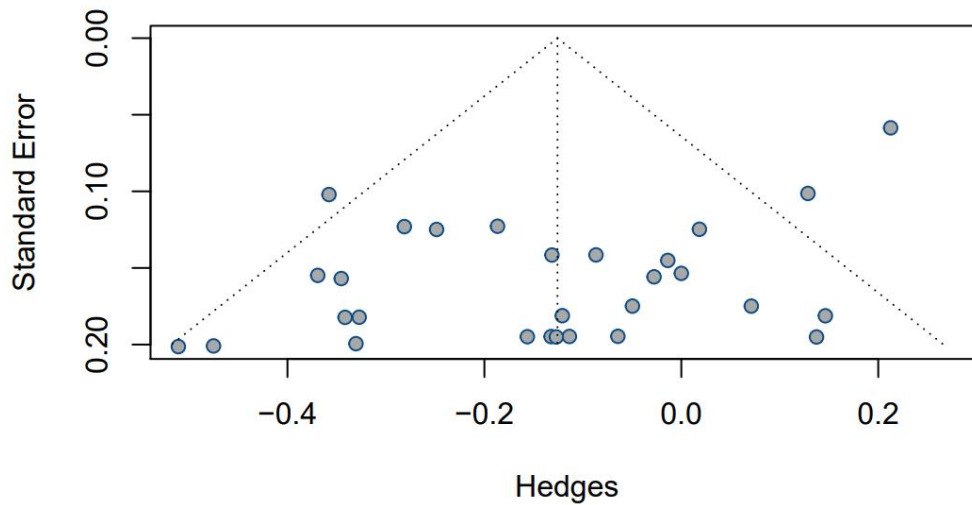**20. Figure S7b Funnel plot for parental mental health ( $P < 0.05$ )**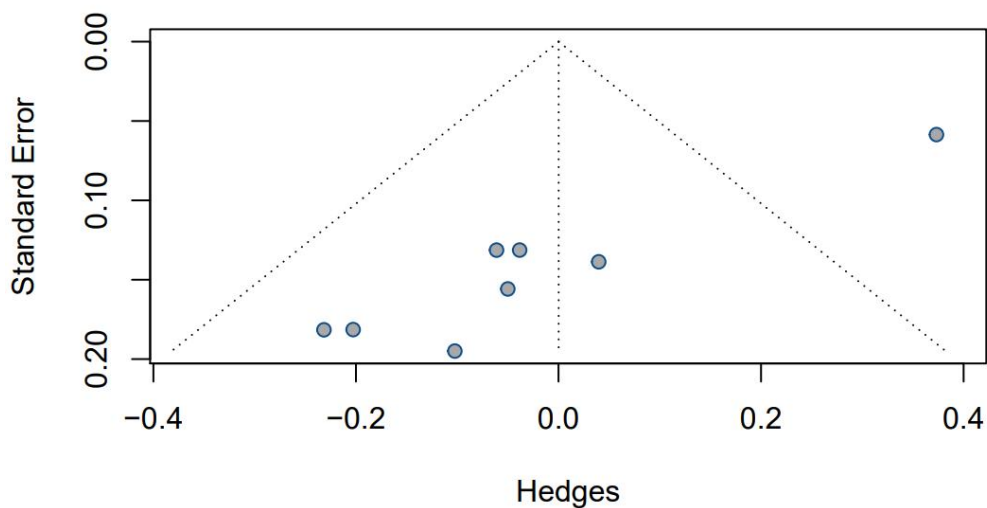**21. Figure S7c Funnel plot for parenting stress ( $P > 0.05$ )**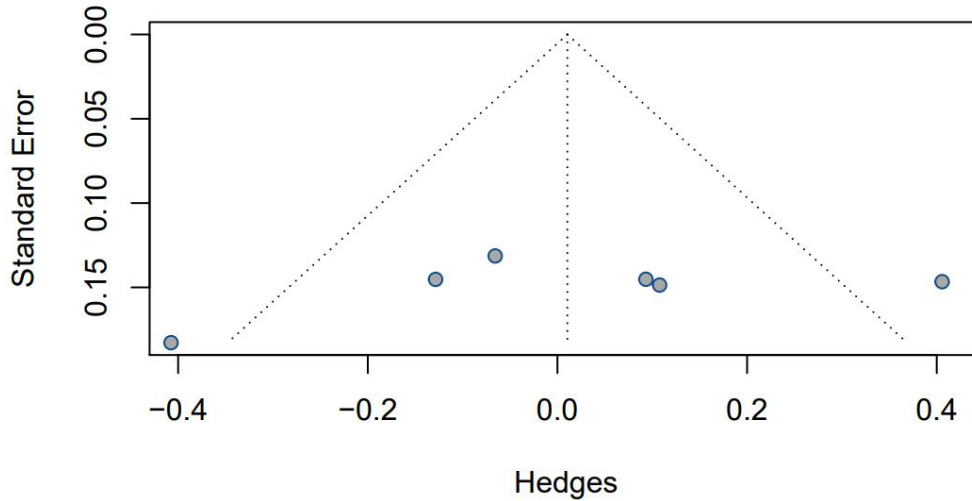

**22. Figure S7d Funnel plot for parent-child relationship ( $P > 0.05$ )**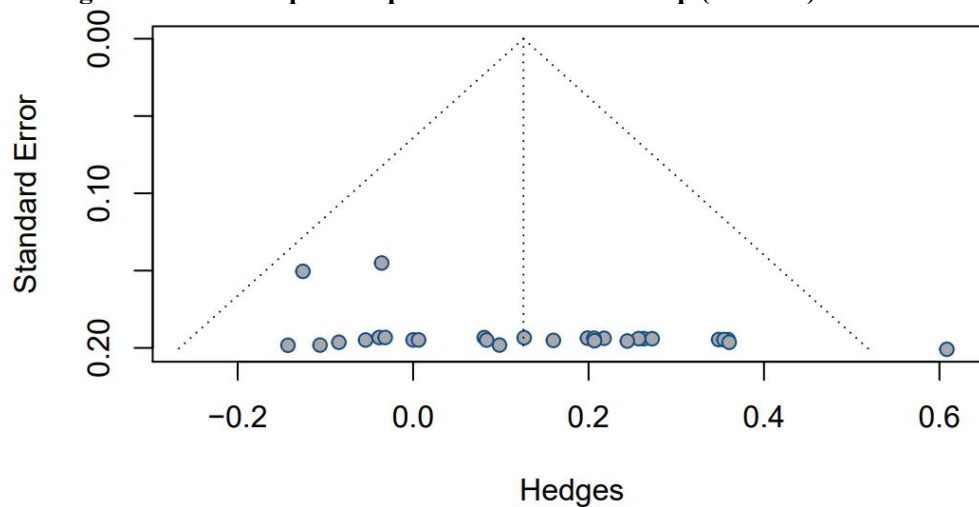**23. Figure S7e Funnel plot for couple relationship satisfaction ( $P > 0.05$ )**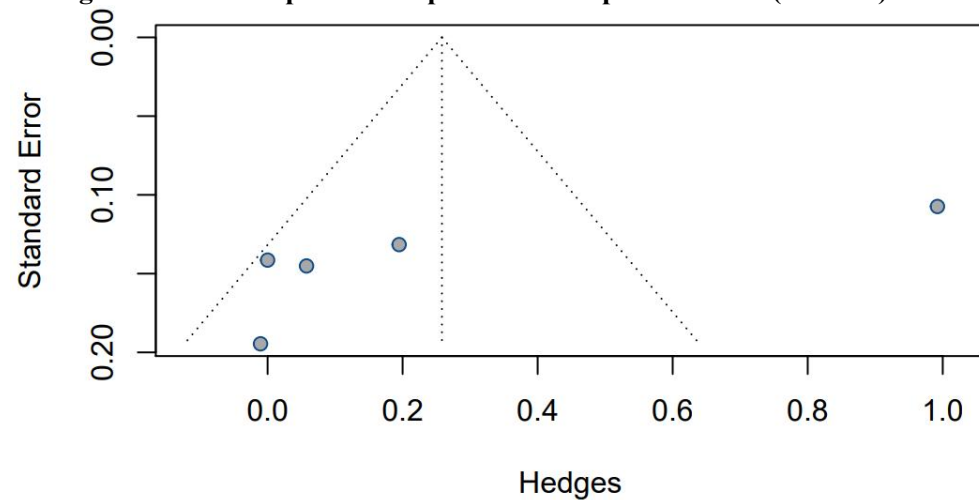**24. Figure S7f Funnel plot for family functioning ( $P < 0.05$ )**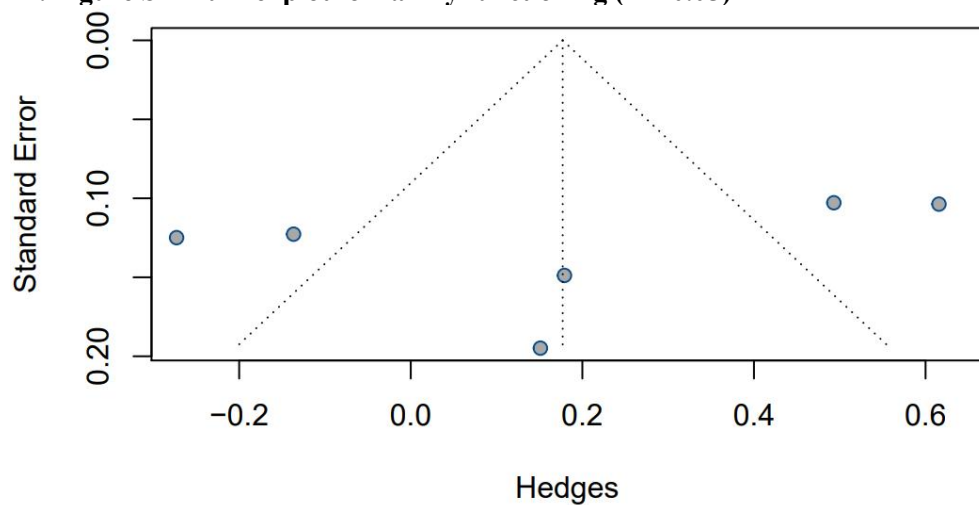

**References** (The following references correspond to the citations in Table S3.)

- 1 Achenbach TM, Rescorla LA. *Manual for the ASEBA Preschool forms & profiles*. Burlington: University of Vermont, Research Center for Children, Youth & Families; 2000.
- 2 Farr RH, Forssell SL, Patterson CJ. Parenting and Child Development in Adoptive Families: Does Parental Sexual Orientation Matter? *Appl Dev Sci*. 2010;14(3):164-178. doi: 10.1080/10888691.2010.500958.
- 3 Goodman A, Goodman R. Strengths and Difficulties Questionnaire scores and mental health in looked after children. *Br J Psychiatry*. 2012;200(5):426-427. doi: 10.1192/bjp.bp.111.104380.
- 4 Bourdon KH, Goodman R, Rae DS, Simpson G, Koretz DS. The Strengths and Difficulties Questionnaire: U.S. normative data and psychometric properties. *J Am Acad Child Adolesc Psychiatry*. 2005;44(6):557-564. doi: 10.1097/01.chi.0000159157.57075.c8.
- 5 Crouch SR, Waters E, McNair R, Power J, Davis E. ACHES – The Australian study of child health in same-sex families: background research, design and methodology. *BMC public health*. 2012;12(1):646. doi: 10.1186/1471-2458-12-646.
- 6 Golombok S, Rust J. The Pre-School Activities Inventory: A standardized assessment of gender role in children. *Psychol Assess*. 1993;5(2):131-136. doi: 10.1037/1040-3590.5.2.131.
- 7 Carnaghi A, Anderson J, Bianchi M. On the Origin of Beliefs about the Sexual Orientation and Gender-role Development of Children Raised by Gay-male and Heterosexual Parents: An Italian Study. *Men Masc*. 2018;23(3-4):636-660. doi: 10.1177/1097184X18775462.
- 8 Regnerus M. How different are the adult children of parents who have same-sex relationships? Findings from the New Family Structures Study. *Soc Sci Res*. 2012;41(4):752-770. doi: 10.1016/j.ssresearch.2012.03.009.
- 9 Radloff LS. The CES-D Scale: A self-report depression scale for research in the general population. *Appl Psychol Meas*. 1977;1(3):385-401. doi: 10.1177/014662167700100306.
- 10 Spielberger CD, Gorsuch RL, Lushene RE, et al. *Manual for the State-Trait Anxiety Inventory*. Consulting Psychogysts Press: Palo Alto, CA, USA; 1983.
- 11 Kessler RC, Andrews G, Colpe LJ, et al. Short screening scales to monitor population prevalences and trends in non-specific psychological distress. *Psychol Med*. 2002;32(6):959-976. doi: 10.1017/s0033291702006074.
- 12 Derogatis LR, Melisaratos N. The Brief Symptom Inventory: an introductory report. *Psychol Med*. 1983;13(3):595-605. doi: 10.1017/S0033291700048017.
- 13 Abidin RR. *Parenting Stress Index: Professional manual* (3rd ed.). Odessa, FL: Psychological Assessment Resources. 1995.
- 14 Grotevant H, Cooper C. Patterns of Interaction in Family Relationships and the Development of Identity Exploration in Adolescence. *Child Dev*. 1985;56:415-428. doi: 10.1111/j.1467-8624.1985.tb00116.x.
- 15 Stevenson-Hinde J, Shouldice A. Maternal Interactions and Self-Reports Related to Attachment Classifications at 4.5 Years. *Child Dev*. 1995;66(3):583-596. doi: 10.1111/j.1467-8624.1995.tb00891.x.
- 16 Spanier GB. Measuring dyadic adjustment: New scales for assessing the quality of marriage and similar dyads. *J Marriage Fam*. 1976; 38(1):15-28. doi: 10.2307/350547.
- 17 Rust J, Bannun I, Crowe M, Golombok S. The Golombok Rust Inventory of Marital State (GRIMS). *Sexual and Relationship Therapy*. 2010; 25(1):48-53. doi: 10.1080/02674658608407680.



- 18 Trivette CM, Dunst CJ, Deal AG, Hamby DW, Sexton D. Assessing family strengths and capabilities. In: Dunst CJ, Trivette CM, Deal AG, eds. *Supporting and strengthening families: Methods, strategies and practices*. 1994:132-139.
- 19 Olson D. FACES IV and the Circumplex Model: validation study. *J Marital Fam Ther*. 2007;37(1):64-80. doi: 10.1111/j.1752-0606.2009.00175.x.
- 20 Epstein NB, Baldwin LM, Bishop DS. THE McMASTER FAMILY ASSESSMENT DEVICE. *J Marital Fam Ther*. 1983;9(2):171-180. doi: 10.1111/j.1752-0606.1983.tb01497.x.
- 21 Procidano ME., Heller K. Measures of perceived social support from friends and from family: Three validation studies. *Am J Community Psychol*. 1983;11(1):1-24. doi: 10.1007/BF00898416.
- 22 Dekovic M, Groenendaal J, Noom M, et.al. Theoretisch kader en opzet van het onderzoek. In: Rispens J, Hermans J, Meeus W, eds. *Opvoeden in Nederland*. Assen, the Netherlands: VanGorcum. 1996;81:6-28. <https://doi.org/10.1007/BF03060655>.
